# Supplementary material
Source: publisher site journal article supplement (https://www.dovepress.com/article/482646)
Supplement: Supplementary file 1 [file 482646.pdf › 482646.pdf]

# Supplementary Information 1

## Materials and Methods

### ***Western Blotting***

Cells or sEVs were lysed by the radioimmunoprecipitation assay (RIPA) lysis buffer (Beyotime, Shanghai, China) with inhibitors of protease and phosphatase. Protein samples were separated by sodium dodecyl sulfate-polyacrylamide gel (SDS-PAGE) electrophoresis and transferred onto polyvinylidene difluoride (PVDF) membranes (EMD Millipore, Billerica, MA, USA). The PVDF membranes were blocked with 5% bovine serum albumin for 1 h, and incubated with primary antibodies at 4°C for 10 h. After incubation with horseradish peroxidase-labeled secondary antibodies for 1 h, the PVDF membranes were developed by Electro-Chemi-Luminescence (ECL) detection reagent (Biosharp, Hefei, China). The integrated density of the gray value for each WB band was analyzed by the ImageJ Software (Bethesda, MD, USA). The density ratios of target proteins and  $\beta$ -Actin were calculated, and the relative expression quantities of control groups were normalized to 1. The primary antibodies used in this study are listed in Table S1.

### ***Quantitative Real-Time PCR Analysis***

After treatments, RNA was extracted from NPCs by the RNA-easy Isolation Reagent (Vazyme Biotech, Nanjing, China). The RNA concentration and purity were assessed using the Nanodrop 2000. The mRNA was reverse-transcribed by complementary DNA (cDNA) Synthesis Kit (Yeasen Biotechnology, Shanghai, China). The gene expression levels were

quantified by qPCR SYBR Green Master Mix (Yeastar Biotechnology) on the Step One Plus Real-Time PCR system (Bio-Rad, Hercules, CA, USA). Relative quantities of target genes were normalized to *Actb* levels and calculated using the  $2^{-\Delta\Delta C_t}$  method <sup>1</sup>.  $2^{-\Delta\Delta C_t} > 1$  indicated that the expression of the target gene in the treatment group was more abundant than that in the corresponding control group. The primer sequences are listed in Table S2.

## ***Histological Analysis***

The paraffin-embedded rat IVD samples were cut into 4  $\mu$ m thick sections. Hematoxylin and eosin (HE) and safranin O-fast green (SOFG) were conducted to assess histological scoring as previously reported <sup>2</sup>.

Immunohistochemical (IHC) staining was conducted to detect the ratios of senescent NPCs, and the expression levels of SASP and LIN28A in rat IVD tissues. The paraffin sections were deparaffinized, rehydrated, and treated with 3% H<sub>2</sub>O<sub>2</sub> for 20 min at room temperature. Antigen retrieval was conducted in EDTA buffer (pH 8.0) at 95°C for 15 min. Subsequently, the sections were blocked with 20% goat serum at room temperature for 1 h, followed by the incubation with anti-p16 (1:500), anti-IL-1 $\beta$  (1:300), anti-TNF- $\alpha$  (1:300), anti-MMP13 (1:250), and anti-LIN28A (1:200) antibodies at 4°C overnight. Nonimmune rabbit IgG was used as negative control primary antibody. After being washed, the sections were incubated with horseradish peroxidase-conjugated secondary antibody at room temperature for 1 h, visualized with diaminobenzidine, and stained with hematoxylin. The IHC Intensity was measured by ImageJ as previously reported <sup>3</sup>.

## References

1. Schmittgen TD, Livak KJ. Analyzing real-time PCR data by the comparative C(T) method.  
*Nat Protoc.* 2008;3(6):1101-1108. doi: 10.1038/nprot.2008.73
2. Rutges JP, Duit RA, Kummer JA, et al. A validated new histological classification for  
intervertebral disc degeneration. *Osteoarthritis Cartilage.* 2013;21(12):2039-2047. doi:  
10.1016/j.joca.2013.10.001
3. Jensen EC. Quantitative analysis of histological staining and fluorescence using ImageJ.  
*Anat Rec (Hoboken).* 2013;296(3):378-381. doi: 10.1002/ar.22641

## Supplementary Tables

**Table S1 The antibodies used in the study**

| Antibodies                       | Source                               | Catalog No. | Applications |
|----------------------------------|--------------------------------------|-------------|--------------|
| anti-rat CD32                    | BD, Franklin Lake, NJ                | 550270      | FCM          |
| FITC-conjugated anti-rat CD11b/c | BioLegend, San Diego, CA             | 201805      | FCM          |
| APC-conjugated anti-rat CD68     | Miltenyi, Bergesch Gladbach, Germany | 130-102-725 | FCM          |
| BV421-conjugated anti-rat CD86   | BD                                   | 743211      | FCM          |
| PE-conjugated anti-CD206         | Santa Cruz, Dallas, TX               | sc-58986 PE | FCM          |
| $\beta$ -Actin                   | Affinity, Cincinnati, OH             | AF7018      | WB           |
| NLRP3                            | Abmart, Shanghai, China              | T55651      | WB           |
| NF- $\kappa$ B p65               | Abmart                               | T55034      | WB           |
| p-NF- $\kappa$ B p65 (S536)      | Abmart                               | TP56372     | WB           |
| STAT3                            | Abclonal, Wuhan, China               | A1192       | WB           |
| p-STAT3 (Y705)                   | Abclonal                             | AP0070      | WB           |
| TSG101                           | Abclonal                             | A5789       | WB           |
| CD9                              | Abclonal                             | A1703       | WB           |
| CD63                             | Abclonal                             | A19023      | WB           |
| CD81                             | Abclonal                             | A5270       | WB           |
| p16 (INK4A/CDKN2A)               | Proteintech, Rosemont, IL            | 10883-1-AP  | WB, IHC      |
| p21 (CDKN1A)                     | Santa Cruz                           | sc-6246     | WB           |
| p53                              | Santa Cruz                           | sc-98       | WB           |

|               |                      |            |         |
|---------------|----------------------|------------|---------|
| Collagen II   | Affinity             | AF0135     | WB      |
| SOX9          | Abclonal             | A2479      | WB      |
| MMP13         | Proteintech          | 18165-1-AP | WB, IHC |
| IL-1 $\beta$  | Abclonal             | A16288     | IHC     |
| TNF- $\alpha$ | Abclonal             | A0277      | IHC     |
| LIN28A        | Abcam, Cambridge, UK | ab279647   | WB, IHC |

FCM: Flow cytometry; WB: Western blotting; IHC: Immunohistochemical staining

**Table S2 The primer sequences for qRT-PCR used in the study**

| <b>Primer</b>    | <b>Sequences (5' to 3')</b> |
|------------------|-----------------------------|
| <i>Actb</i> -F   | CGTTGACATCCGTAAAGACCTC      |
| <i>Actb</i> -R   | TAGGAGCCAGGGCAGTAATCT       |
| <i>Il1a</i> -F   | CCTCGTCCTAAGTCACTCGC        |
| <i>Il1a</i> -R   | GCAGAGTCTTTTTGACCCTCCT      |
| <i>Il1b</i> -F   | GGTGGTTCAAGGCATAACA         |
| <i>Il1b</i> -R   | TGTCGAGATGCTGCTGTGAG        |
| <i>Il6</i> -F    | GACCAAGACCATCCAAC           |
| <i>Il6</i> -R    | TAGGTTTGCCGAGTAGAC          |
| <i>Ccl2</i> -F   | ATGCAGTTAATGCCCCACTC        |
| <i>Ccl2</i> -R   | TTCCTTATTGGGGTCAGCAC        |
| <i>Ccl5</i> -F   | ATATGGCTCGGACACCACTC        |
| <i>Ccl5</i> -R   | CAAAGACGACTGCAAGGTTGG       |
| <i>Tnf</i> -F    | CCAATCTGTGTCCTTCTAA         |
| <i>Tnf</i> -R    | TTCTGAGCATCGTAGTTG          |
| <i>Mmp3</i> -F   | TTTGGCCGTCTCTTCCATCC        |
| <i>Mmp3</i> -R   | GCATCGATCTTCTGGACGGT        |
| <i>Mmp13</i> -F  | GGA CTCACTGTTGGTCCCTG       |
| <i>Mmp13</i> -R  | GGATTCCCGCAAGAGTCACA        |
| <i>Col2a1</i> -F | CTCAAGTCGCTGAACAACCA        |
| <i>Col2a1</i> -R | GTCTCCGCTCTTCCACTCTG        |

---

|                      |                                              |
|----------------------|----------------------------------------------|
| <i>Acan</i> -F       | AAGTGCTATGCTGGCTGGTT                         |
| <i>Acan</i> -R       | GGTCTGGTTGGGGTAGAGGT                         |
| <i>Lin28a</i> -F     | AGAAAGTGGGAATCGGGTGG                         |
| <i>Lin28a</i> -R     | CTACAGAAGGGCTTCTCCCCT                        |
| <i>Tmsb4x</i> -F     | TTCCACGAGCATTGCCTTC                          |
| <i>Tmsb4x</i> -R     | GCCTTCCTGGTCAGTAGTTC                         |
| <i>Tmsb10</i> -F     | AGAAAACCGAGACGCAGGAG                         |
| <i>Tmsb10</i> -R     | CACATCACGAGGGGGTTCTT                         |
| <i>Ptma</i> -F       | ATGACATGCGCTCTTCACCA                         |
| <i>Ptma</i> -R       | TTCACACATACATCAAACAGGC                       |
| <i>U6</i> -RT        | AACGCTTCACGAATTTGCGT                         |
| <i>U6</i> -F         | CTCGCTTCGGCAGCACA                            |
| <i>U6</i> -R         | AACGCTTCACGAATTTGCGT                         |
| <i>let-7i-5p</i> -RT | CTCAACTGGTGTCGTGGAGTCGGCAATTCAGTTGAGAACAGCAC |
| <i>let-7i-5p</i> -F  | ACACTCCAGCTGGGTGAGGTAGTAGTTT                 |
| <i>let-7i-5p</i> -R  | TGGTGTCGTGGAGTCG                             |

---

F: Forward primer; R: Reverse primer; RT: Reverse transcription primer

**Table S3 The siRNA sequences of *Lin28a***

| <b>siRNA</b>                   | <b>Sequences (5' to 3')</b> |
|--------------------------------|-----------------------------|
| si- <i>Lin28a</i> -1-sense     | GCAUCUGUAAGUGGUUCAA         |
| si- <i>Lin28a</i> -1-antisense | UUGAACCACUUACAGAUGC         |
| si- <i>Lin28a</i> -2-sense     | GAGCAAGCUGCACAUGGAA         |
| si- <i>Lin28a</i> -2-antisense | UUCCAUGUGCAGCUUGCUC         |
| si- <i>Lin28a</i> -3-sense     | GCCAAAGCAUCAGCCAUAU         |
| si- <i>Lin28a</i> -3-antisense | AUAUGGCUGAUGCUUUGGC         |



**Table S4: RNA-seq results of rat BMDMs**

**Table S5 Inflammatory factor concentrations in MΦ-CM detected by CBA**

| <b>Treatment</b>      | <b>CCL2</b>    | <b>TNF-α</b>   | <b>IL-1β</b>   | <b>IL-1α</b>   | <b>IL-6</b>    |
|-----------------------|----------------|----------------|----------------|----------------|----------------|
|                       | <b>(pg/ml)</b> | <b>(pg/ml)</b> | <b>(pg/ml)</b> | <b>(pg/ml)</b> | <b>(pg/ml)</b> |
| <b>Untreated MΦ 1</b> | 1928.88        | 10.15          | <8.73          | <8.05          | <70.21         |
| <b>Untreated MΦ 2</b> | 1414.58        | <7.43          | 10.05          | <8.05          | <70.21         |
| <b>Untreated MΦ 3</b> | 2847.78        | 10.15          | <8.73          | <8.05          | <70.21         |
| <b>Untreated MΦ 4</b> | 2813.82        | 9.61           | <8.73          | <8.05          | <70.21         |
| <b>Untreated MΦ 5</b> | 2013.42        | 8.43           | <8.73          | <8.05          | <70.21         |
| <b>LPS+IFNγ-MΦ 1</b>  | 15189.42       | 698.34         | <8.73          | 144.85         | 1595.94        |
| <b>LPS+IFNγ-MΦ 2</b>  | 20654.21       | 451.91         | <8.73          | 58.16          | 1179.01        |
| <b>LPS+IFNγ-MΦ 3</b>  | 20913.73       | 601.97         | <8.73          | 110.71         | 1291.42        |
| <b>LPS+IFNγ-MΦ 4</b>  | 25072.79       | 818.14         | 9.32           | 175.10         | 2304.05        |
| <b>LPS+IFNγ-MΦ 5</b>  | 9697.95        | 25.55          | 11.05          | 24.85          | 1463.05        |
| <b>IL-4-MΦ 1</b>      | 4828.81        | 7.49           | <8.73          | <8.05          | <70.21         |
| <b>IL-4-MΦ 2</b>      | 3279.93        | <7.43          | <8.73          | <8.05          | <70.21         |
| <b>IL-4-MΦ 3</b>      | 4022.96        | <7.43          | <8.73          | <8.05          | <70.21         |
| <b>IL-4-MΦ 4</b>      | 5412.20        | 7.63           | <8.73          | <8.05          | <70.21         |
| <b>IL-4-MΦ 5</b>      | 1391.77        | <7.43          | <8.73          | <8.05          | <70.21         |

**Table S6 Inflammatory factor concentrations in NPC-CM detected by CBA**

| <b>Treatment</b>                                           | <b>CCL2<br/>(pg/ml)</b> | <b>TNF-<math>\alpha</math><br/>(pg/ml)</b> | <b>IL-1<math>\beta</math><br/>(pg/ml)</b> | <b>IL-1<math>\alpha</math><br/>(pg/ml)</b> | <b>IL-6<br/>(pg/ml)</b> |
|------------------------------------------------------------|-------------------------|--------------------------------------------|-------------------------------------------|--------------------------------------------|-------------------------|
| <b>Control 1</b>                                           | 19.16                   | <7.43                                      | <8.73                                     | <8.05                                      | <70.21                  |
| <b>Control 2</b>                                           | 83.48                   | <7.43                                      | <8.73                                     | <8.05                                      | <70.21                  |
| <b>Control 3</b>                                           | 94.60                   | <7.43                                      | <8.73                                     | <8.05                                      | 72.67                   |
| <b>Control 4</b>                                           | 178.07                  | <7.43                                      | <8.73                                     | <8.05                                      | <70.21                  |
| <b>Control 5</b>                                           | 482.09                  | <7.43                                      | <8.73                                     | <8.05                                      | <70.21                  |
| <b>LPS+IFN<math>\gamma</math>-M<math>\Phi</math>-CM 1</b>  | 3983.14                 | <7.43                                      | <8.73                                     | <8.05                                      | 2318.71                 |
| <b>LPS+IFN<math>\gamma</math>-M<math>\Phi</math>-CM 2</b>  | 4481.39                 | 29.81                                      | <8.73                                     | 17.87                                      | 15645.13                |
| <b>LPS+IFN<math>\gamma</math>-M<math>\Phi</math>-CM 3</b>  | 5482.73                 | 645.99                                     | <8.73                                     | <8.05                                      | 21567.77                |
| <b>LPS+IFN<math>\gamma</math>-M<math>\Phi</math>-CM 4</b>  | 5717.86                 | 12.23                                      | <8.73                                     | <8.05                                      | 7474.44                 |
| <b>LPS+IFN<math>\gamma</math>-M<math>\Phi</math>-CM 5</b>  | 9443.74                 | <7.43                                      | <8.73                                     | <8.05                                      | 1154.95                 |
| <b>IL-4-M<math>\Phi</math>-CM 1</b>                        | 574.09                  | <7.43                                      | <8.73                                     | <8.05                                      | <70.21                  |
| <b>IL-4-M<math>\Phi</math>-CM 2</b>                        | 632.41                  | <7.43                                      | <8.73                                     | <8.05                                      | <70.21                  |
| <b>IL-4-M<math>\Phi</math>-CM 3</b>                        | 656.10                  | 14.06                                      | <8.73                                     | <8.05                                      | 78.78                   |
| <b>IL-4-M<math>\Phi</math>-CM 4</b>                        | 674.72                  | <7.43                                      | <8.73                                     | <8.05                                      | 82.07                   |
| <b>IL-4-M<math>\Phi</math>-CM 5</b>                        | 688.67                  | <7.43                                      | <8.73                                     | <8.05                                      | 145.76                  |
| <b>LPS+IFN<math>\gamma</math>-M<math>\Phi</math>-sEV 1</b> | 5055.00                 | <7.43                                      | <8.73                                     | <8.05                                      | 15873.12                |
| <b>LPS+IFN<math>\gamma</math>-M<math>\Phi</math>-sEV 2</b> | 5775.20                 | 8.09                                       | <8.73                                     | <8.05                                      | 14469.62                |
| <b>LPS+IFN<math>\gamma</math>-M<math>\Phi</math>-sEV 3</b> | 6626.00                 | 22.12                                      | <8.73                                     | 8.47                                       | 16265.37                |
| <b>LPS+IFN<math>\gamma</math>-M<math>\Phi</math>-sEV 4</b> | 7441.52                 | 22.42                                      | <8.73                                     | <8.05                                      | 8514.32                 |

|                                                            |          |       |       |       |          |
|------------------------------------------------------------|----------|-------|-------|-------|----------|
| <b>LPS+IFN<math>\gamma</math>-M<math>\Phi</math>-sEV 5</b> | 13019.38 | 21.76 | <8.73 | <8.05 | 8007.16  |
| <b>IL-4-M<math>\Phi</math>-sEV 1</b>                       | 2493.29  | <7.43 | <8.73 | <8.05 | 11404.50 |
| <b>IL-4-M<math>\Phi</math>-sEV 2</b>                       | 2580.53  | <7.43 | <8.73 | <8.05 | 8480.58  |
| <b>IL-4-M<math>\Phi</math>-sEV 3</b>                       | 4239.71  | <7.43 | <8.73 | <8.05 | 11113.81 |
| <b>IL-4-M<math>\Phi</math>-sEV 4</b>                       | 6779.95  | <7.43 | <8.73 | <8.05 | 7771.55  |
| <b>IL-4-M<math>\Phi</math>-sEV 5</b>                       | 7292.55  | <7.43 | <8.73 | <8.05 | 7061.65  |

---

**Table S7: PANDORA-seq results of MΦ-sEVs**

| miRNA           | log2FoldChange | pvalue   | padj     | LPS+IFNγ-<br>MΦ-sEV-1 | LPS+IFNγ-<br>MΦ-sEV-2 | LPS+IFNγ-<br>MΦ-sEV-3 | IL-4-MΦ-<br>sEV-1 | IL-4-MΦ-<br>sEV-2 | IL-4-MΦ-<br>sEV-3 |
|-----------------|----------------|----------|----------|-----------------------|-----------------------|-----------------------|-------------------|-------------------|-------------------|
| rno-let-7a-1-3p | -0.86951       | 0.678676 | 0.978652 | 0                     | 2                     | 2                     | 1                 | 1                 | 1                 |
| rno-let-7a-5p   | -0.49911       | 0.516073 | 0.978652 | 20                    | 12                    | 61                    | 23                | 48                | 16                |
| rno-let-7b-5p   | -0.20681       | 0.749231 | 0.978652 | 21                    | 24                    | 32                    | 19                | 38                | 38                |
| rno-let-7c-2-3p | -0.86951       | 0.678676 | 0.978652 | 0                     | 2                     | 2                     | 1                 | 1                 | 1                 |
| rno-let-7c-5p   | -0.2257        | 0.710337 | 0.978652 | 31                    | 42                    | 34                    | 34                | 37                | 65                |
| rno-let-7d-3p   | -1.42837       | 0.606373 | 0.978652 | 1                     | 2                     | 0                     | 2                 | 0                 | 0                 |
| rno-let-7d-5p   | -1.75624       | 0.110108 | 0.978652 | 8                     | 6                     | 12                    | 1                 | 2                 | 8                 |
| rno-let-7e-5p   | 0.744737       | 0.580382 | 0.978652 | 4                     | 1                     | 1                     | 5                 | 8                 | 3                 |
| rno-let-7f-1-3p | 2.018804       | 0.612547 | 0.978652 | 0                     | 0                     | 0                     | 0                 | 3                 | 0                 |
| rno-let-7f-5p   | -0.01519       | 0.973538 | 0.981664 | 135                   | 191                   | 200                   | 244               | 274               | 242               |
| rno-let-7g-3p   | -0.00846       | 0.996311 | 0.996311 | 2                     | 0                     | 2                     | 2                 | 1                 | 3                 |
| rno-let-7g-5p   | -0.55907       | 0.306416 | 0.978652 | 40                    | 58                    | 58                    | 64                | 32                | 63                |
| rno-let-7i-3p   | 0.187513       | 0.899867 | 0.978652 | 1                     | 2                     | 6                     | 0                 | 6                 | 7                 |
| rno-let-7i-5p   | -0.19176       | 0.715752 | 0.978652 | 372                   | 732                   | 412                   | 752               | 434               | 841               |
| rno-miR-1-3p    | -0.75869       | 0.510429 | 0.978652 | 1                     | 3                     | 17                    | 6                 | 4                 | 6                 |
| rno-miR-101a-3p | 0.526616       | 0.513311 | 0.978652 | 4                     | 13                    | 22                    | 14                | 37                | 23                |
| rno-miR-101a-5p | 0.386058       | 0.924624 | 0.978652 | 0                     | 0                     | 0                     | 0                 | 0                 | 1                 |
| rno-miR-101b-3p | 0.393554       | 0.810759 | 0.978652 | 2                     | 0                     | 3                     | 6                 | 1                 | 3                 |
| rno-miR-103-3p  | -0.62275       | 0.469223 | 0.978652 | 5                     | 9                     | 16                    | 7                 | 8                 | 12                |
| rno-miR-106b-3p | 1.214603       | 0.76394  | 0.978652 | 0                     | 0                     | 0                     | 1                 | 0                 | 1                 |
| rno-miR-106b-5p | 0.884668       | 0.512023 | 0.978652 | 3                     | 1                     | 2                     | 4                 | 2                 | 11                |
| rno-miR-107-3p  | -1.09174       | 0.484812 | 0.978652 | 3                     | 1                     | 3                     | 2                 | 1                 | 2                 |

|                   |          |          |          |     |     |     |     |     |     |
|-------------------|----------|----------|----------|-----|-----|-----|-----|-----|-----|
| rno-miR-10a-5p    | 0.530746 | 0.772878 | 0.978652 | 0   | 0   | 6   | 1   | 6   | 3   |
| rno-miR-122-5p    | -1.84854 | 0.013208 | 0.792484 | 482 | 76  | 283 | 188 | 54  | 147 |
| rno-miR-125a-3p   | -4.55599 | 0.032629 | 0.978652 | 2   | 3   | 4   | 0   | 0   | 0   |
| rno-miR-125a-5p   | -1.12831 | 0.373363 | 0.978652 | 1   | 7   | 13  | 1   | 9   | 2   |
| rno-miR-125b-2-3p | 0.386058 | 0.924624 | 0.978652 | 0   | 0   | 0   | 0   | 1   | 0   |
| rno-miR-125b-5p   | -0.10764 | 0.936822 | 0.978652 | 0   | 3   | 32  | 2   | 29  | 5   |
| rno-miR-126a-3p   | -0.42291 | 0.583707 | 0.978652 | 289 | 37  | 457 | 521 | 192 | 171 |
| rno-miR-126a-5p   | -0.88128 | 0.304616 | 0.978652 | 98  | 6   | 116 | 88  | 29  | 67  |
| rno-miR-127-3p    | -0.2387  | 0.838862 | 0.978652 | 2   | 1   | 13  | 8   | 5   | 5   |
| rno-miR-127-5p    | -3.83561 | 0.176538 | 0.978652 | 3   | 0   | 2   | 0   | 0   | 0   |
| rno-miR-128-3p    | -0.50372 | 0.546502 | 0.978652 | 6   | 10  | 11  | 11  | 7   | 10  |
| rno-miR-1298      | 2.087205 | 0.600224 | 0.978652 | 0   | 0   | 0   | 4   | 0   | 0   |
| rno-miR-1306-3p   | -1.5375  | 0.706327 | 0.978652 | 0   | 1   | 0   | 0   | 0   | 0   |
| rno-miR-1306-5p   | 0.386058 | 0.924624 | 0.978652 | 0   | 0   | 0   | 0   | 1   | 0   |
| rno-miR-130a-3p   | 0.195231 | 0.747181 | 0.978652 | 26  | 55  | 28  | 85  | 61  | 45  |
| rno-miR-130b-3p   | -0.71576 | 0.376776 | 0.978652 | 41  | 17  | 16  | 48  | 19  | 10  |
| rno-miR-132-3p    | 0.386058 | 0.924624 | 0.978652 | 0   | 0   | 0   | 1   | 0   | 0   |
| rno-miR-133a-3p   | 1.10075  | 0.78607  | 0.978652 | 0   | 0   | 0   | 2   | 0   | 0   |
| rno-miR-136-3p    | -0.38455 | 0.8536   | 0.978652 | 0   | 0   | 8   | 6   | 0   | 2   |
| rno-miR-139-5p    | 1.053113 | 0.766613 | 0.978652 | 0   | 0   | 1   | 0   | 3   | 0   |
| rno-miR-140-3p    | -0.33357 | 0.634978 | 0.978652 | 17  | 10  | 34  | 36  | 16  | 19  |
| rno-miR-140-5p    | -0.35204 | 0.622055 | 0.978652 | 12  | 24  | 23  | 18  | 13  | 36  |
| rno-miR-141-3p    | -3.74385 | 0.263277 | 0.978652 | 4   | 0   | 0   | 0   | 0   | 0   |
| rno-miR-142-3p    | 0.234579 | 0.649203 | 0.978652 | 230 | 183 | 229 | 367 | 252 | 531 |
| rno-miR-142-5p    | 0.612093 | 0.35427  | 0.978652 | 29  | 200 | 143 | 294 | 321 | 182 |
| rno-miR-144-3p    | 0.118369 | 0.930069 | 0.978652 | 2   | 3   | 6   | 12  | 0   | 6   |

|                   |          |          |          |     |     |     |      |     |     |
|-------------------|----------|----------|----------|-----|-----|-----|------|-----|-----|
| rno-miR-144-5p    | 1.138432 | 0.550764 | 0.978652 | 1   | 1   | 1   | 10   | 1   | 0   |
| rno-miR-145-5p    | 0.134066 | 0.905509 | 0.978652 | 5   | 0   | 16  | 16   | 7   | 9   |
| rno-miR-146a-3p   | 1.386836 | 0.535814 | 0.978652 | 0   | 1   | 1   | 2    | 5   | 0   |
| rno-miR-146a-5p   | 0.083234 | 0.888721 | 0.978652 | 368 | 757 | 259 | 1056 | 743 | 508 |
| rno-miR-146b-3p   | -0.63688 | 0.828519 | 0.978652 | 0   | 0   | 4   | 0    | 0   | 3   |
| rno-miR-146b-5p   | 0.389388 | 0.683797 | 0.978652 | 1   | 9   | 11  | 9    | 14  | 14  |
| rno-miR-147       | -0.74869 | 0.525212 | 0.978652 | 14  | 11  | 0   | 12   | 4   | 10  |
| rno-miR-148a-3p   | -0.10627 | 0.897732 | 0.978652 | 12  | 4   | 26  | 13   | 16  | 25  |
| rno-miR-148a-5p   | -1.5375  | 0.706327 | 0.978652 | 1   | 0   | 0   | 0    | 0   | 0   |
| rno-miR-148b-3p   | 0.622058 | 0.476807 | 0.978652 | 5   | 3   | 14  | 20   | 9   | 19  |
| rno-miR-148b-5p   | -1.5375  | 0.706327 | 0.978652 | 0   | 0   | 1   | 0    | 0   | 0   |
| rno-miR-150-5p    | 0.617632 | 0.68933  | 0.978652 | 0   | 1   | 6   | 2    | 8   | 3   |
| rno-miR-151-5p    | -0.34787 | 0.574582 | 0.978652 | 27  | 22  | 25  | 41   | 25  | 24  |
| rno-miR-152-3p    | 0.759854 | 0.369847 | 0.978652 | 6   | 11  | 8   | 37   | 21  | 7   |
| rno-miR-155-5p    | -3.1918  | 5.44E-06 | 0.001307 | 26  | 101 | 66  | 7    | 11  | 12  |
| rno-miR-15b-3p    | 0.746247 | 0.567669 | 0.978652 | 2   | 3   | 1   | 8    | 3   | 5   |
| rno-miR-15b-5p    | -0.37291 | 0.635524 | 0.978652 | 25  | 14  | 10  | 31   | 10  | 22  |
| rno-miR-16-5p     | 0.417363 | 0.384012 | 0.978652 | 224 | 248 | 206 | 643  | 360 | 411 |
| rno-miR-17-1-3p   | -0.69868 | 0.793611 | 0.978652 | 0   | 3   | 0   | 2    | 0   | 1   |
| rno-miR-17-5p     | 0.056349 | 0.915154 | 0.978652 | 41  | 47  | 45  | 93   | 52  | 67  |
| rno-miR-181a-1-3p | 1.30925  | 0.652873 | 0.978652 | 0   | 1   | 0   | 2    | 2   | 0   |
| rno-miR-181a-5p   | -0.8852  | 0.267248 | 0.978652 | 7   | 12  | 42  | 11   | 17  | 15  |
| rno-miR-181b-1-3p | 0.386058 | 0.924624 | 0.978652 | 0   | 0   | 0   | 0    | 1   | 0   |
| rno-miR-181b-5p   | -0.23838 | 0.829569 | 0.978652 | 11  | 1   | 5   | 12   | 4   | 8   |
| rno-miR-181c-3p   | -1.49846 | 0.687437 | 0.978652 | 0   | 2   | 0   | 1    | 0   | 0   |
| rno-miR-181d-5p   | 1.552146 | 0.572505 | 0.978652 | 1   | 0   | 0   | 3    | 0   | 2   |

|                  |          |          |          |     |     |     |     |     |     |
|------------------|----------|----------|----------|-----|-----|-----|-----|-----|-----|
| rno-miR-182      | -1.97224 | 0.508495 | 0.978652 | 1   | 0   | 2   | 0   | 0   | 1   |
| rno-miR-183-5p   | 1.10075  | 0.78607  | 0.978652 | 0   | 0   | 0   | 2   | 0   | 0   |
| rno-miR-1839-5p  | -3.93105 | 0.156737 | 0.978652 | 2   | 0   | 4   | 0   | 0   | 0   |
| rno-miR-184      | -1.5375  | 0.706327 | 0.978652 | 0   | 0   | 1   | 0   | 0   | 0   |
| rno-miR-1843a-3p | -0.57571 | 0.887799 | 0.978652 | 0   | 1   | 0   | 0   | 0   | 1   |
| rno-miR-1843a-5p | -1.5375  | 0.706327 | 0.978652 | 0   | 1   | 0   | 0   | 0   | 0   |
| rno-miR-1843b-5p | -1.5375  | 0.706327 | 0.978652 | 0   | 1   | 0   | 0   | 0   | 0   |
| rno-miR-185-5p   | 0.133161 | 0.947077 | 0.978933 | 2   | 0   | 1   | 1   | 3   | 1   |
| rno-miR-186-5p   | -0.58549 | 0.439789 | 0.978652 | 12  | 9   | 33  | 20  | 20  | 10  |
| rno-miR-187-3p   | -0.57571 | 0.887799 | 0.978652 | 0   | 0   | 1   | 0   | 1   | 0   |
| rno-miR-188-5p   | 1.798376 | 0.65294  | 0.978652 | 0   | 0   | 0   | 2   | 1   | 0   |
| rno-miR-18a-5p   | -1.62636 | 0.164675 | 0.978652 | 10  | 3   | 6   | 6   | 3   | 1   |
| rno-miR-191a-3p  | -2.35133 | 0.452381 | 0.978652 | 3   | 0   | 0   | 0   | 0   | 1   |
| rno-miR-191a-5p  | -0.49142 | 0.317414 | 0.978652 | 346 | 287 | 410 | 496 | 392 | 235 |
| rno-miR-192-5p   | -0.4477  | 0.887088 | 0.978652 | 2   | 0   | 0   | 3   | 0   | 0   |
| rno-miR-193a-5p  | 1.427645 | 0.722876 | 0.978652 | 0   | 0   | 0   | 0   | 2   | 0   |
| rno-miR-194-5p   | 2.271213 | 0.528369 | 0.978652 | 0   | 0   | 0   | 2   | 2   | 0   |
| rno-miR-1949     | 0.386058 | 0.924624 | 0.978652 | 0   | 0   | 0   | 0   | 1   | 0   |
| rno-miR-196b-5p  | -1.5375  | 0.706327 | 0.978652 | 1   | 0   | 0   | 0   | 0   | 0   |
| rno-miR-199a-3p  | -0.62906 | 0.425251 | 0.978652 | 12  | 7   | 31  | 18  | 18  | 9   |
| rno-miR-199a-5p  | -0.62879 | 0.513555 | 0.978652 | 16  | 1   | 21  | 12  | 11  | 13  |
| rno-miR-19a-3p   | 0.621543 | 0.420959 | 0.978652 | 4   | 13  | 10  | 20  | 18  | 22  |
| rno-miR-19a-5p   | -1.5375  | 0.706327 | 0.978652 | 0   | 1   | 0   | 0   | 0   | 0   |
| rno-miR-19b-3p   | 0.147913 | 0.791072 | 0.978652 | 42  | 40  | 49  | 107 | 41  | 76  |
| rno-miR-204-5p   | 0.386058 | 0.924624 | 0.978652 | 0   | 0   | 0   | 0   | 1   | 0   |
| rno-miR-205      | -4.55588 | 0.10923  | 0.978652 | 7   | 0   | 0   | 0   | 0   | 0   |



|                 |          |          |          |     |     |     |     |     |     |
|-----------------|----------|----------|----------|-----|-----|-----|-----|-----|-----|
| rno-miR-206-3p  | -1.5375  | 0.706327 | 0.978652 | 1   | 0   | 0   | 0   | 0   | 0   |
| rno-miR-208a-3p | -2.17089 | 0.592683 | 0.978652 | 0   | 0   | 2   | 0   | 0   | 0   |
| rno-miR-20a-5p  | -0.52429 | 0.531564 | 0.978652 | 5   | 10  | 18  | 10  | 7   | 15  |
| rno-miR-20b-5p  | -1.9352  | 0.330943 | 0.978652 | 2   | 0   | 6   | 2   | 0   | 1   |
| rno-miR-21-3p   | -1.01322 | 0.632822 | 0.978652 | 0   | 8   | 0   | 1   | 0   | 5   |
| rno-miR-21-5p   | 0.107484 | 0.848276 | 0.978652 | 114 | 397 | 217 | 535 | 300 | 342 |
| rno-miR-210-3p  | -1.60722 | 0.041806 | 0.978652 | 13  | 40  | 13  | 13  | 11  | 9   |
| rno-miR-218a-5p | -1.21847 | 0.542645 | 0.978652 | 0   | 3   | 2   | 1   | 1   | 1   |
| rno-miR-22-3p   | 1.420715 | 0.292229 | 0.978652 | 1   | 6   | 2   | 4   | 28  | 1   |
| rno-miR-22-5p   | 0.386058 | 0.924624 | 0.978652 | 0   | 0   | 0   | 0   | 1   | 0   |
| rno-miR-221-3p  | -0.43802 | 0.562493 | 0.978652 | 12  | 28  | 13  | 29  | 21  | 10  |
| rno-miR-222-3p  | 1.757621 | 0.660514 | 0.978652 | 0   | 0   | 0   | 2   | 0   | 1   |
| rno-miR-222-5p  | 0.386058 | 0.924624 | 0.978652 | 0   | 0   | 0   | 0   | 0   | 1   |
| rno-miR-223-3p  | 0.754349 | 0.129606 | 0.978652 | 115 | 166 | 108 | 381 | 338 | 283 |
| rno-miR-223-5p  | 2.68372  | 0.008705 | 0.696377 | 5   | 3   | 0   | 21  | 38  | 23  |
| rno-miR-224-5p  | -0.78184 | 0.684397 | 0.978652 | 0   | 2   | 3   | 2   | 1   | 1   |
| rno-miR-23a-3p  | -0.67305 | 0.19527  | 0.978652 | 58  | 114 | 99  | 122 | 68  | 65  |
| rno-miR-23b-3p  | -0.91518 | 0.175486 | 0.978652 | 20  | 21  | 19  | 16  | 17  | 15  |
| rno-miR-24-2-5p | 0.248501 | 0.795821 | 0.978652 | 2   | 20  | 8   | 35  | 7   | 13  |
| rno-miR-24-3p   | 0.371978 | 0.552507 | 0.978652 | 35  | 38  | 18  | 76  | 59  | 52  |
| rno-miR-25-3p   | 0.513842 | 0.425343 | 0.978652 | 28  | 15  | 31  | 91  | 33  | 41  |
| rno-miR-26a-5p  | -0.29108 | 0.617169 | 0.978652 | 28  | 38  | 101 | 60  | 68  | 57  |
| rno-miR-26b-3p  | 0.386058 | 0.924624 | 0.978652 | 0   | 0   | 0   | 0   | 0   | 1   |
| rno-miR-26b-5p  | 0.605573 | 0.538772 | 0.978652 | 6   | 2   | 5   | 10  | 9   | 11  |
| rno-miR-27a-3p  | 0.155975 | 0.77183  | 0.978652 | 113 | 209 | 104 | 265 | 255 | 203 |
| rno-miR-27a-5p  | 1.945969 | 0.621438 | 0.978652 | 0   | 0   | 0   | 0   | 1   | 2   |

|                  |          |          |          |     |     |     |      |      |      |
|------------------|----------|----------|----------|-----|-----|-----|------|------|------|
| rno-miR-27b-3p   | 0.919674 | 0.08403  | 0.978652 | 261 | 858 | 795 | 1601 | 1373 | 2145 |
| rno-miR-28-3p    | -0.03385 | 0.962391 | 0.981664 | 7   | 18  | 15  | 21   | 16   | 20   |
| rno-miR-28-5p    | 0.386058 | 0.924624 | 0.978652 | 0   | 0   | 0   | 0    | 0    | 1    |
| rno-miR-299a-3p  | -0.44106 | 0.796232 | 0.978652 | 6   | 0   | 4   | 12   | 0    | 1    |
| rno-miR-299b-3p  | 0.386058 | 0.924624 | 0.978652 | 0   | 0   | 0   | 1    | 0    | 0    |
| rno-miR-29a-3p   | 0.210462 | 0.654761 | 0.978652 | 125 | 238 | 288 | 324  | 365  | 376  |
| rno-miR-29b-3p   | -0.01704 | 0.977574 | 0.981664 | 66  | 217 | 80  | 234  | 141  | 174  |
| rno-miR-29c-3p   | 0.819288 | 0.085716 | 0.978652 | 63  | 88  | 159 | 291  | 265  | 216  |
| rno-miR-29c-5p   | 2.271213 | 0.528369 | 0.978652 | 0   | 0   | 0   | 2    | 2    | 0    |
| rno-miR-300-3p   | 0.140307 | 0.971786 | 0.981664 | 0   | 1   | 0   | 2    | 0    | 0    |
| rno-miR-301a-3p  | 0.601952 | 0.29307  | 0.978652 | 19  | 40  | 28  | 75   | 66   | 55   |
| rno-miR-301a-5p  | -2.49892 | 0.413865 | 0.978652 | 0   | 4   | 0   | 0    | 0    | 1    |
| rno-miR-301b-3p  | 0.411366 | 0.725389 | 0.978652 | 0   | 15  | 4   | 17   | 15   | 5    |
| rno-miR-3068-3p  | 0.801651 | 0.806275 | 0.978652 | 0   | 0   | 1   | 2    | 0    | 1    |
| rno-miR-3068-5p  | -1.4749  | 0.197079 | 0.978652 | 7   | 10  | 2   | 4    | 2    | 5    |
| rno-miR-30a-3p   | 0.299918 | 0.708718 | 0.978652 | 3   | 37  | 33  | 45   | 53   | 25   |
| rno-miR-30a-5p   | 0.056805 | 0.935248 | 0.978652 | 9   | 19  | 51  | 37   | 46   | 26   |
| rno-miR-30b-3p   | -0.57571 | 0.887799 | 0.978652 | 0   | 1   | 0   | 1    | 0    | 0    |
| rno-miR-30b-5p   | 0.261766 | 0.67895  | 0.978652 | 12  | 30  | 58  | 47   | 62   | 52   |
| rno-miR-30c-1-3p | -2.77179 | 0.344189 | 0.978652 | 4   | 0   | 0   | 1    | 0    | 0    |
| rno-miR-30c-2-3p | -1.35467 | 0.691521 | 0.978652 | 0   | 1   | 1   | 1    | 0    | 0    |
| rno-miR-30c-5p   | 0.45123  | 0.474356 | 0.978652 | 17  | 13  | 29  | 34   | 45   | 36   |
| rno-miR-30d-3p   | 0.386058 | 0.924624 | 0.978652 | 0   | 0   | 0   | 1    | 0    | 0    |
| rno-miR-30d-5p   | -0.70724 | 0.371897 | 0.978652 | 11  | 22  | 84  | 22   | 50   | 18   |
| rno-miR-30e-3p   | -0.74924 | 0.279442 | 0.978652 | 13  | 17  | 44  | 16   | 18   | 26   |
| rno-miR-30e-5p   | 0.412921 | 0.59945  | 0.978652 | 8   | 5   | 29  | 25   | 31   | 19   |

|                 |          |          |          |      |     |     |      |     |      |
|-----------------|----------|----------|----------|------|-----|-----|------|-----|------|
| rno-miR-32-3p   | 1.10075  | 0.78607  | 0.978652 | 0    | 0   | 0   | 2    | 0   | 0    |
| rno-miR-32-5p   | 2.635579 | 0.142073 | 0.978652 | 0    | 0   | 2   | 4    | 8   | 4    |
| rno-miR-320-3p  | -0.50941 | 0.818146 | 0.978652 | 0    | 2   | 4   | 0    | 5   | 0    |
| rno-miR-322-5p  | 0.158792 | 0.77951  | 0.978652 | 24   | 64  | 50  | 104  | 66  | 58   |
| rno-miR-324-3p  | -1.62524 | 0.6099   | 0.978652 | 1    | 1   | 0   | 0    | 0   | 1    |
| rno-miR-324-5p  | -0.34881 | 0.696643 | 0.978652 | 3    | 17  | 13  | 18   | 5   | 15   |
| rno-miR-326-3p  | 1.10075  | 0.78607  | 0.978652 | 0    | 0   | 0   | 2    | 0   | 0    |
| rno-miR-328a-3p | -3.13602 | 0.352228 | 0.978652 | 2    | 0   | 1   | 0    | 0   | 0    |
| rno-miR-33-5p   | 0.339041 | 0.756245 | 0.978652 | 3    | 8   | 8   | 11   | 1   | 23   |
| rno-miR-331-3p  | 0.386058 | 0.924624 | 0.978652 | 0    | 0   | 0   | 0    | 0   | 1    |
| rno-miR-335     | 0.386058 | 0.924624 | 0.978652 | 0    | 0   | 0   | 0    | 1   | 0    |
| rno-miR-338-3p  | 0.386058 | 0.924624 | 0.978652 | 0    | 0   | 0   | 0    | 0   | 1    |
| rno-miR-339-5p  | -2.01746 | 0.14475  | 0.978652 | 8    | 3   | 4   | 2    | 0   | 4    |
| rno-miR-340-3p  | 2.151175 | 0.565501 | 0.978652 | 0    | 0   | 0   | 3    | 0   | 1    |
| rno-miR-340-5p  | 0.086683 | 0.950381 | 0.978933 | 0    | 1   | 11  | 7    | 5   | 4    |
| rno-miR-342-3p  | 0.441543 | 0.862364 | 0.978652 | 0    | 0   | 3   | 1    | 0   | 4    |
| rno-miR-345-3p  | -0.75328 | 0.628741 | 0.978652 | 6    | 4   | 1   | 1    | 9   | 0    |
| rno-miR-345-5p  | -2.4606  | 0.542208 | 0.978652 | 0    | 2   | 0   | 0    | 0   | 0    |
| rno-miR-3473    | -0.07924 | 0.892705 | 0.978652 | 1340 | 555 | 709 | 1777 | 913 | 1361 |
| rno-miR-34a-5p  | -0.22566 | 0.736497 | 0.978652 | 40   | 46  | 21  | 65   | 24  | 59   |
| rno-miR-34c-5p  | 0.386058 | 0.924624 | 0.978652 | 0    | 0   | 0   | 0    | 1   | 0    |
| rno-miR-350     | -1.13606 | 0.436142 | 0.978652 | 3    | 9   | 0   | 5    | 2   | 2    |
| rno-miR-351-5p  | 1.912039 | 0.630498 | 0.978652 | 0    | 0   | 0   | 1    | 2   | 0    |
| rno-miR-3559-5p | 1.505075 | 0.597922 | 0.978652 | 0    | 1   | 0   | 4    | 0   | 1    |
| rno-miR-3583-5p | 0.386058 | 0.924624 | 0.978652 | 0    | 0   | 0   | 1    | 0   | 0    |
| rno-miR-3586-3p | -1.21135 | 0.757428 | 0.978652 | 0    | 0   | 2   | 0    | 0   | 1    |

|                 |          |          |          |    |    |    |     |     |    |
|-----------------|----------|----------|----------|----|----|----|-----|-----|----|
| rno-miR-3590-3p | 0.386058 | 0.924624 | 0.978652 | 0  | 0  | 0  | 0   | 1   | 0  |
| rno-miR-361-3p  | 1.67694  | 0.675597 | 0.978652 | 0  | 0  | 0  | 3   | 0   | 0  |
| rno-miR-361-5p  | 1.10075  | 0.78607  | 0.978652 | 0  | 0  | 0  | 2   | 0   | 0  |
| rno-miR-362-5p  | 0.386058 | 0.924624 | 0.978652 | 0  | 0  | 0  | 1   | 0   | 0  |
| rno-miR-365-3p  | 1.619872 | 0.510454 | 0.978652 | 1  | 0  | 0  | 2   | 1   | 2  |
| rno-miR-369-3p  | -1.18866 | 0.433064 | 0.978652 | 3  | 3  | 3  | 3   | 3   | 0  |
| rno-miR-374-5p  | -0.21384 | 0.937875 | 0.978652 | 0  | 0  | 3  | 0   | 1   | 2  |
| rno-miR-378a-3p | 0.42173  | 0.431089 | 0.978652 | 36 | 33 | 84 | 101 | 100 | 87 |
| rno-miR-378a-5p | 1.096245 | 0.612855 | 0.978652 | 2  | 0  | 0  | 6   | 1   | 1  |
| rno-miR-378b    | 1.120232 | 0.119445 | 0.978652 | 8  | 6  | 15 | 26  | 25  | 39 |
| rno-miR-379-5p  | -0.4777  | 0.522276 | 0.978652 | 53 | 14 | 22 | 43  | 23  | 40 |
| rno-miR-382-5p  | -2.93153 | 0.067584 | 0.978652 | 7  | 3  | 5  | 0   | 0   | 3  |
| rno-miR-409a-5p | -2.73444 | 0.495841 | 0.978652 | 2  | 0  | 0  | 0   | 0   | 0  |
| rno-miR-411-5p  | -0.44631 | 0.888033 | 0.978652 | 0  | 0  | 3  | 3   | 0   | 0  |
| rno-miR-421-3p  | -1.5375  | 0.706327 | 0.978652 | 0  | 0  | 1  | 0   | 0   | 0  |
| rno-miR-423-3p  | 0.386058 | 0.924624 | 0.978652 | 0  | 0  | 0  | 1   | 0   | 0  |
| rno-miR-423-5p  | 0.554454 | 0.720929 | 0.978652 | 1  | 0  | 6  | 7   | 1   | 6  |
| rno-miR-425-5p  | 0.537108 | 0.850262 | 0.978652 | 0  | 0  | 2  | 3   | 0   | 1  |
| rno-miR-448-3p  | 2.379665 | 0.497463 | 0.978652 | 0  | 0  | 0  | 0   | 2   | 2  |
| rno-miR-449a-5p | -0.57571 | 0.887799 | 0.978652 | 0  | 1  | 0  | 0   | 0   | 1  |
| rno-miR-450a-3p | -2.73444 | 0.495841 | 0.978652 | 2  | 0  | 0  | 0   | 0   | 0  |
| rno-miR-451-5p  | 0.259888 | 0.831839 | 0.978652 | 5  | 0  | 9  | 11  | 10  | 3  |
| rno-miR-452-5p  | -1.49827 | 0.58067  | 0.978652 | 3  | 0  | 0  | 1   | 0   | 1  |
| rno-miR-455-5p  | 1.757621 | 0.660514 | 0.978652 | 0  | 0  | 0  | 2   | 0   | 1  |
| rno-miR-466b-5p | 1.990768 | 0.295576 | 0.978652 | 0  | 2  | 0  | 5   | 5   | 2  |
| rno-miR-466c-5p | -3.95197 | 0.036114 | 0.978652 | 3  | 5  | 3  | 1   | 0   | 0  |

|                  |          |          |          |    |    |    |     |     |     |
|------------------|----------|----------|----------|----|----|----|-----|-----|-----|
| rno-miR-483-5p   | -2.73444 | 0.495841 | 0.978652 | 2  | 0  | 0  | 0   | 0   | 0   |
| rno-miR-486      | -0.90245 | 0.759819 | 0.978652 | 2  | 0  | 0  | 1   | 0   | 1   |
| rno-miR-487b-3p  | -0.57571 | 0.887799 | 0.978652 | 0  | 0  | 1  | 1   | 0   | 0   |
| rno-miR-488-3p   | 1.67694  | 0.675597 | 0.978652 | 0  | 0  | 0  | 3   | 0   | 0   |
| rno-miR-490-3p   | -1.5375  | 0.706327 | 0.978652 | 0  | 0  | 1  | 0   | 0   | 0   |
| rno-miR-494-3p   | -0.78035 | 0.65485  | 0.978652 | 5  | 0  | 3  | 6   | 0   | 2   |
| rno-miR-495      | 0.138977 | 0.972663 | 0.981664 | 0  | 0  | 1  | 2   | 0   | 0   |
| rno-miR-497-5p   | -1.5375  | 0.706327 | 0.978652 | 1  | 0  | 0  | 0   | 0   | 0   |
| rno-miR-499-5p   | -1.97233 | 0.506236 | 0.978652 | 1  | 0  | 2  | 0   | 1   | 0   |
| rno-miR-500-3p   | 0.386058 | 0.924624 | 0.978652 | 0  | 0  | 0  | 1   | 0   | 0   |
| rno-miR-503-5p   | -1.39614 | 0.063739 | 0.978652 | 13 | 13 | 23 | 9   | 7   | 11  |
| rno-miR-505-5p   | -0.57571 | 0.887799 | 0.978652 | 0  | 1  | 0  | 0   | 0   | 1   |
| rno-miR-511-3p   | -2.17089 | 0.592683 | 0.978652 | 0  | 0  | 2  | 0   | 0   | 0   |
| rno-miR-532-5p   | 1.71455  | 0.003716 | 0.445886 | 18 | 59 | 28 | 189 | 168 | 155 |
| rno-miR-542-3p   | -0.84458 | 0.63772  | 0.978652 | 0  | 1  | 10 | 6   | 2   | 0   |
| rno-miR-542-5p   | 0.142509 | 0.942238 | 0.978933 | 2  | 0  | 2  | 4   | 0   | 3   |
| rno-miR-582-5p   | -0.57571 | 0.887799 | 0.978652 | 1  | 0  | 0  | 0   | 1   | 0   |
| rno-miR-598-3p   | -3.75501 | 0.20061  | 0.978652 | 0  | 1  | 5  | 0   | 0   | 0   |
| rno-miR-632      | 0.386058 | 0.924624 | 0.978652 | 0  | 0  | 0  | 1   | 0   | 0   |
| rno-miR-6333     | 0.386058 | 0.924624 | 0.978652 | 0  | 0  | 0  | 1   | 0   | 0   |
| rno-miR-652-3p   | 0.37094  | 0.872442 | 0.978652 | 1  | 0  | 3  | 8   | 0   | 0   |
| rno-miR-664-2-5p | 0.386058 | 0.924624 | 0.978652 | 0  | 0  | 0  | 1   | 0   | 0   |
| rno-miR-674-3p   | 0.461532 | 0.899831 | 0.978652 | 1  | 0  | 0  | 0   | 2   | 0   |
| rno-miR-674-5p   | -0.45599 | 0.615142 | 0.978652 | 11 | 5  | 9  | 16  | 5   | 8   |
| rno-miR-702-5p   | 0.386058 | 0.924624 | 0.978652 | 0  | 0  | 0  | 1   | 0   | 0   |
| rno-miR-708-5p   | -1.5375  | 0.706327 | 0.978652 | 1  | 0  | 0  | 0   | 0   | 0   |

|                |          |          |          |    |    |    |     |    |    |
|----------------|----------|----------|----------|----|----|----|-----|----|----|
| rno-miR-770-5p | 0.386058 | 0.924624 | 0.978652 | 0  | 0  | 0  | 0   | 0  | 1  |
| rno-miR-7a-5p  | -1.02837 | 0.125223 | 0.978652 | 13 | 50 | 34 | 25  | 19 | 25 |
| rno-miR-872-3p | -0.60275 | 0.697298 | 0.978652 | 3  | 2  | 3  | 2   | 0  | 6  |
| rno-miR-872-5p | -0.36489 | 0.753922 | 0.978652 | 3  | 5  | 3  | 5   | 3  | 5  |
| rno-miR-92a-3p | 0.29952  | 0.918627 | 0.978652 | 2  | 0  | 0  | 0   | 4  | 0  |
| rno-miR-93-5p  | 0.352456 | 0.510203 | 0.978652 | 59 | 39 | 89 | 170 | 97 | 90 |
| rno-miR-98-5p  | -0.41966 | 0.744361 | 0.978652 | 6  | 3  | 1  | 3   | 6  | 3  |
| rno-miR-99a-5p | 0.483218 | 0.6464   | 0.978652 | 1  | 3  | 14 | 9   | 15 | 8  |
| rno-miR-99b-5p | -0.57985 | 0.646455 | 0.978652 | 0  | 3  | 33 | 7   | 17 | 4  |
| rno-miR-9a-5p  | 0.113466 | 0.965747 | 0.981664 | 0  | 0  | 3  | 1   | 0  | 3  |

---

**Table S8: Protein profiling results of EV-free IL-4-MΦ-CM**

| <b>Accession</b> | <b>Gene</b> | <b>Description</b>                          |
|------------------|-------------|---------------------------------------------|
| P63259           | Actg1       | Actin, cytoplasmic 2                        |
| P62329           | Tmsb4x      | Thymosin beta-4                             |
| Q6IN37           | Gm2a        | GM2 ganglioside activator                   |
| Q6P6T6           | Ctsd        | Cathepsin D                                 |
| Q6P7C7           | Gpnmb       | Transmembrane glycoprotein NMB              |
| Q5XFV4           | Fabp4       | Fabp4 protein                               |
| P05942           | S100a4      | Protein S100-A4                             |
| P62963           | Pfn1        | Profilin-1                                  |
| P06302           | Ptma        | Prothymosin alpha                           |
| P05964           | S100a6      | Protein S100-A6                             |
| F1M8E9           | Lyz2        | Lysozyme                                    |
| Q6IN22           | Ctsb        | Cathepsin B                                 |
| P04797           | Gapdh       | Glyceraldehyde-3-phosphate dehydrogenase    |
| B0BNA5           | Cotl1       | Coactosin-like protein                      |
| Q07936           | Anxa2       | Annexin A2                                  |
| F7FJQ3           | Npc2        | NPC intracellular cholesterol transporter 2 |
| A0A0G2JXB1       | Lgals3      | Galectin                                    |
| P11762           | Lgals1      | Galectin-1                                  |
| G3V8C3           | Vim         | Vimentin                                    |
| P11232           | Txn         | Thioredoxin                                 |

|            |         |                                     |
|------------|---------|-------------------------------------|
| P05065     | Aldoa   | Fructose-bisphosphate aldolase A    |
| P62260     | Ywhae   | 14-3-3 protein epsilon              |
| P02650     | Apoe    | Apolipoprotein E                    |
| Q6AYC4     | Capg    | Macrophage-capping protein          |
| Q5XI73     | Arhgdia | Rho GDP-dissociation inhibitor 1    |
| P85973     | Pnp     | Purine nucleoside phosphorylase     |
| Q00715     |         | Histone H2B type 1                  |
| P69897     | Tubb5   | Tubulin beta-5 chain                |
| P04642     | Ldha    | L-lactate dehydrogenase A chain     |
| P62986     | Uba52   | Ubiquitin-60S ribosomal protein L40 |
| P0DP31     | Calm3   | Calmodulin-3                        |
| P09495     | Tpm4    | Tropomyosin alpha-4 chain           |
| P07335     | Ckb     | Creatine kinase B-type              |
| Q5XI38     | Lcp1    | Lymphocyte cytosolic protein 1      |
| P63102     | Ywhaz   | 14-3-3 protein zeta/delta           |
| Q9EPB1     | Dpp7    | Dipeptidyl peptidase 2              |
| A0A0G2K3Z9 |         | Uncharacterized protein             |
| P48500     | Tpi1    | Triosephosphate isomerase           |
| P07151     | B2m     | Beta-2-microglobulin                |
| P50137     | Tkt     | Transketolase                       |
| Q9R1T3     | Ctsz    | Cathepsin Z                         |
| P45592     | Cfl1    | Cofilin-1                           |



|            |              |                                                      |
|------------|--------------|------------------------------------------------------|
| Q62658     | Fkbp1a       | Peptidyl-prolyl cis-trans isomerase FKBP1A           |
| P14841     | Cst3         | Cystatin-C                                           |
| P14668     | Anxa5        | Annexin A5                                           |
| B2RZ27     | Sh3bgrl3     | SH3 domain binding glutamic acid-rich protein-like 3 |
| A0A0G2JSS8 | Prdx5        | Peroxiredoxin                                        |
| P63312     | Tmsb10       | Thymosin beta-10                                     |
| A0A0H2UHM7 | LOC100909441 | Tubulin alpha chain                                  |
| P19804     | Nme2         | Nucleoside diphosphate kinase B                      |
| A0A0G2K1C0 | Actr3        | Actin-related protein 3                              |
| P11030     | Dbi          | Acyl-CoA-binding protein                             |
| P08721     | Spp1         | Osteopontin                                          |
| D3ZSL2     | Abrac1       | ABRA C-terminal-like                                 |
| P19944     | Rplp1        | 60S acidic ribosomal protein P1                      |
| Q6B345     | S100a11      | Protein S100-A11                                     |
| P01041     | Cstb         | Cystatin-B                                           |
| A0A0G2JVG3 | Pkm          | Pyruvate kinase                                      |
| D4A4S3     | Hspa8        | Heat shock cognate 71 kDa protein                    |
| P55053     | Fabp5        | Fatty acid-binding protein 5                         |
| Q5U362     | Anxa4        | Annexin                                              |
| P07150     | Anxa1        | Annexin A1                                           |
| P63029     | Tpt1         | Translationally-controlled tumor protein             |
| M0R5J4     |              | Uncharacterized protein                              |

|            |              |                                                 |
|------------|--------------|-------------------------------------------------|
| D3ZZR3     | Ctss         | Cathepsin S                                     |
| P82995     | Hsp90aa1     | Heat shock protein HSP 90-alpha                 |
| R9PXT7     | Mmp12        | Macrophage metalloelastase                      |
| P10111     | Ppia         | Peptidyl-prolyl cis-trans isomerase A           |
| A0A0G2JWE1 | Myl6         | Myosin light polypeptide 6                      |
| A0A0G2JSH9 | Prdx2        | Peroxiredoxin-2                                 |
| P80067     | Ctsc         | Dipeptidyl peptidase 1                          |
| P07154     | Ctsl         | Cathepsin L1                                    |
| P25113     | Pgam1        | Phosphoglycerate mutase 1                       |
| P04636     | Mdh2         | Malate dehydrogenase, mitochondrial             |
| M0R757     | LOC100360413 | Elongation factor 1-alpha                       |
| P50399     | Gdi2         | Rab GDP dissociation inhibitor beta             |
| P04906     | Gstp1        | Glutathione S-transferase P                     |
| P31044     | Pebp1        | Phosphatidylethanolamine-binding protein 1      |
| A0A1W2Q6E9 | Msn          | Moesin                                          |
| Q06000     | Lpl          | Lipoprotein lipase                              |
| Q5EBB0     | LOC298795    | Similar to 14-3-3 protein sigma                 |
| Q920A6     | Scpep1       | Retinoid-inducible serine carboxypeptidase      |
| Q641Z7     | Smpdl3a      | Acid sphingomyelinase-like phosphodiesterase 3a |
| Q5XFX0     | Tagln2       | Transgelin-2                                    |
| Q8VHC1     | Cst6         | Cystatin E/M                                    |
| P34058     | Hsp90ab1     | Heat shock protein HSP 90-beta                  |

|            |           |                                                   |
|------------|-----------|---------------------------------------------------|
| Q66H12     | Naga      | Alpha-N-acetylgalactosaminidase                   |
| P85968     | Pgd       | 6-phosphogluconate dehydrogenase, decarboxylating |
| A0A0G2JSV6 | Hba-a2    | Globin c2                                         |
| D4ACV3     | Hist2h2ac | Histone H2A                                       |
| Q5M860     | Arhgdib   | Rho GDP dissociation inhibitor beta               |
| D3ZJ08     | Hist2h3c2 | Histone H3                                        |
| Q6Q0N1     | Cndp2     | Cytosolic non-specific dipeptidase                |
| Q5PPG2     | Lgmn      | Legumain                                          |
| Q63610     | Tpm3      | Tropomyosin alpha-3 chain                         |
| Q9WUC4     | Atox1     | Copper transport protein ATOX1                    |
| O88656     | Arpc1b    | Actin-related protein 2/3 complex subunit 1B      |
| P51635     | Akr1a1    | Aldo-keto reductase family 1 member A1            |
| Q9EQS0     | Taldo1    | Transaldolase                                     |
| Q3T1J1     | Eif5a     | Eukaryotic translation initiation factor 5A-1     |
| Q6P6V0     | Gpi       | Glucose-6-phosphate isomerase                     |
| A0A0G2JSU3 | Set       | Protein SET                                       |
| P05197     | Eef2      | Elongation factor 2                               |
| Q6AYS3     | Ctsa      | Carboxypeptidase                                  |
| G3V786     | Akr1b8    | Aldo-keto reductase family 1, member B8           |
| P62775     | Mtpn      | Myotrophin                                        |
| P35467     | S100a1    | Protein S100-A1                                   |
| Q5U2V4     | Plbd1     | Phospholipase B-like 1                            |

|            |              |                                                      |
|------------|--------------|------------------------------------------------------|
| F1M2K3     | Sumo2        | Small ubiquitin-related modifier                     |
| D4A4D5     | LOC498555    | Similar to 60S acidic ribosomal protein P2           |
| P61983     | Ywhag        | 14-3-3 protein gamma                                 |
| P18418     | Calr         | Calreticulin                                         |
| Q62714     | Np4          | Neutrophil antibiotic peptide NP-4                   |
| Q3MIE4     | Vat1         | Synaptic vesicle membrane protein VAT-1 homolog      |
| F1LMW7     | Marcks       | Myristoylated alanine-rich C-kinase substrate        |
| Q6IMZ3     | Anxa6        | Annexin                                              |
| Q499T2     | Ifi30        | Gamma-interferon-inducible lysosomal thiol reductase |
| Q6AXR4     | Hexb         | Beta-hexosaminidase subunit beta                     |
| Q5M7U6     | Actr2        | Actin-related protein 2                              |
| B2GV73     | Arpc3        | Actin-related protein 2/3 complex subunit 3          |
| P04785     | P4hb         | Protein disulfide-isomerase                          |
| D3ZE63     |              | Uncharacterized protein                              |
| A0A0G2K4H6 | Galns        | N-acetylgalactosamine-6-sulfatase                    |
| A0A0G2K9A2 | Arpc2        | Arp2/3 complex 34 kDa subunit                        |
| Q6MG61     | Clic1        | Chloride intracellular channel protein 1             |
| D4A954     | LOC100360143 | Similar to Spleen protein 1 precursor (RSP-1)        |
| Q9Z0V5     | Prdx4        | Peroxiredoxin-4                                      |
| P35213     | Ywhab        | 14-3-3 protein beta/alpha                            |
| A0A0G2K013 | Actn4        | Alpha-actinin-4                                      |
| P10960     | Psap         | Prosaposin                                           |

|        |              |                                                     |
|--------|--------------|-----------------------------------------------------|
| D3ZH55 | Fam53c       | Family with sequence similarity 53, member C        |
| P07895 | Sod2         | Superoxide dismutase [Mn], mitochondrial            |
| Q5RKI0 | Wdr1         | WD repeat-containing protein 1                      |
| P50430 | Arsb         | Arylsulfatase B                                     |
| D4A6R4 | LOC100362216 | Hypothetical protein LOC100362216                   |
| P06760 | Gusb         | Beta-glucuronidase                                  |
| Q68FP1 | Gsn          | Gelsolin                                            |
| E9PSP1 | Pltp         | Phospholipid transfer protein                       |
| Q08163 | Cap1         | Adenylyl cyclase-associated protein 1               |
| P85971 | Pgls         | 6-phosphogluconolactonase                           |
| P05370 | G6pdx        | Glucose-6-phosphate 1-dehydrogenase                 |
| P27926 | Hk3          | Hexokinase-3                                        |
| P62804 | Hist1h4b     | Histone H4                                          |
| B5DF65 | Blvrb        | Biliverdin reductase B                              |
| P46462 | Vcp          | Transitional endoplasmic reticulum ATPase           |
| P16617 | Pgk1         | Phosphoglycerate kinase 1                           |
| Q6P7Q4 | Glo1         | Lactoylglutathione lyase                            |
| Q3T1K5 | Capza2       | F-actin-capping protein subunit alpha-2             |
| Q6P9V7 | Psme1        | Proteasome (Prosome, macropain) activator subunit 1 |
| Q5M7T7 | Pla2g7       | Platelet-activating factor acetylhydrolase          |
| Q91ZN1 | Coro1a       | Coronin-1A                                          |
| O88989 | Mdh1         | Malate dehydrogenase, cytoplasmic                   |

|            |         |                                             |
|------------|---------|---------------------------------------------|
| A0A0G2JUD9 | Mmp9    | Matrix metalloproteinase-9                  |
| Q4KLZ0     | Vnn1    | Vanin 1                                     |
| D3ZUM4     | Glb1    | Beta-galactosidase                          |
| D3ZD31     | Mrc1    | Mannose receptor, C type 1                  |
| P47942     | Dpysl2  | Dihydropyrimidinase-related protein 2       |
| F1LRC2     | Aif1    | Allograft inflammatory factor 1             |
| F1M779     | Cltc    | Clathrin heavy chain                        |
| G3V7C6     | Tubb4b  | Tubulin beta chain                          |
| O70509     | Cd44    | CD44 antigen                                |
| G3V6D3     | Atp5f1b | ATP synthase subunit beta                   |
| Q63798     | Psme2   | Proteasome activator complex subunit 2      |
| F1M8F4     | Gmfg    | Glia maturation factor                      |
| B2RZ72     | Arpc4   | Actin-related protein 2/3 complex subunit 4 |
| Q6P686     | Ostf1   | Osteoclast-stimulating factor 1             |
| Q9EQX9     | Ube2n   | Ubiquitin-conjugating enzyme E2 N           |
| P13084     | Npm1    | Nucleophosmin                               |
| P68511     | Ywhah   | 14-3-3 protein eta                          |
| Q8CFN2     | Cdc42   | Cell division control protein 42 homolog    |
| P68255     | Ywhaq   | 14-3-3 protein theta                        |
| P13221     | Got1    | Aspartate aminotransferase, cytoplasmic     |
| F1M5C9     | Ube2d2  | Ubiquitin-conjugating enzyme E2 D2          |
| Q4KMA2     | Rad23b  | UV excision repair protein RAD23 homolog B  |

|        |         |                                                                     |
|--------|---------|---------------------------------------------------------------------|
| P22734 | Comt    | Catechol O-methyltransferase                                        |
| P06762 | Hmox1   | Heme oxygenase 1                                                    |
| D4A8F2 | Rsu1    | Ras suppressor protein 1                                            |
| P11598 | Pdia3   | Protein disulfide-isomerase A3                                      |
| Q9JKB7 | Gda     | Guanine deaminase                                                   |
| D4A133 | Atp6v1a | ATPase H <sup>+</sup> -transporting V1 subunit A                    |
| P17046 | Lamp2   | Lysosome-associated membrane glycoprotein 2                         |
| Q6P7S1 | Asah1   | Acid ceramidase                                                     |
| Q6P9V9 | Tuba1b  | Tubulin alpha-1B chain                                              |
| P01346 | Igf2    | Insulin-like growth factor II                                       |
| P62828 | Ran     | GTP-binding nuclear protein Ran                                     |
| Q5I0D7 | Pepd    | Xaa-Pro dipeptidase                                                 |
| F1M978 | Impa1   | Inositol-1-monophosphatase                                          |
| P05982 | Nqo1    | NAD(P)H dehydrogenase [quinone] 1                                   |
| P10760 | Ahcy    | Adenosylhomocysteinase                                              |
| B5DEN5 | Eef1b2  | Eukaryotic translation elongation factor 1 beta 2                   |
| P60901 | Psma6   | Proteasome subunit alpha type-6                                     |
| P54313 | Gnb2    | Guanine nucleotide-binding protein G(I)/G(S)/G(T)<br>subunit beta-2 |
| O88767 | Park7   | Protein/nucleic acid deglycase DJ-1                                 |
| B2RYQ5 | Erh     | Enhancer of rudimentary homolog                                     |
| C0JPT7 | Flna    | Filamin A                                                           |

|            |          |                                                                               |
|------------|----------|-------------------------------------------------------------------------------|
| G3V7Q7     | Iqgap1   | IQ motif containing GTPase activating protein 1<br>(Predicted), isoform CRA_b |
| A0A0G2JSG6 | Ak2      | Adenylate kinase 2, mitochondrial                                             |
| E2RUH2     | Rnh1     | Ribonuclease inhibitor                                                        |
| Q6JE36     | Ndrp1    | Protein NDRG1                                                                 |
| A0A0G2JUB0 | Fam3c    | Protein FAM3C                                                                 |
| P12346     | Tf       | Serotransferrin                                                               |
| F1LQS6     | Xdh      | RCG61833                                                                      |
| P07632     | Sod1     | Superoxide dismutase [Cu-Zn]                                                  |
| Q6MG73     | C2       | Complement C2                                                                 |
| D4A2F6     | Nhlrc3   | NHL repeat-containing 3                                                       |
| D4AA31     | Prcp     | Prolylcarboxypeptidase                                                        |
| D4A2G9     | Ranbp1   | RAN-binding protein 1                                                         |
| O35244     | Prdx6    | Peroxiredoxin-6                                                               |
| P40112     | Psmb3    | Proteasome subunit beta type-3                                                |
| A0A0G2JSW0 | My12b    | Myosin regulatory light chain 12B                                             |
| G3V852     | Tln1     | RCG55135, isoform CRA_b                                                       |
| M0RDJ4     | Gmfb     | Glia maturation factor                                                        |
| P52555     | Erp29    | Endoplasmic reticulum resident protein 29                                     |
| Q5M7T5     | Serpinc1 | Serine (Or cysteine) peptidase inhibitor, clade C<br>(Antithrombin), member 1 |
| G3V8L3     | Lmna     | Lamin A, isoform CRA_b                                                        |



|            |            |                                                                                                               |
|------------|------------|---------------------------------------------------------------------------------------------------------------|
| F1LM82     | Hnrnpa2b1  | Heterogeneous nuclear ribonucleoproteins A2/B1                                                                |
| P40307     | Psmb2      | Proteasome subunit beta type-2                                                                                |
| P06761     | Hspa5      | Endoplasmic reticulum chaperone BiP                                                                           |
| R9PXU6     | Vcl        | Vinculin                                                                                                      |
| Q641X3     | Hexa       | Beta-hexosaminidase subunit alpha                                                                             |
| G3V904     | Plid4      | Phospholipase D family, member 4                                                                              |
| D3ZAT4     | Serpina9   | Serine (Or cysteine) peptidase inhibitor, clade A (Alpha-1 antiproteinase, antitrypsin), member 9 (Predicted) |
| P07943     | Akr1b1     | Aldo-keto reductase family 1 member B1                                                                        |
| Q6P3V8     | Eif4a1     | Eukaryotic translation initiation factor 4A1                                                                  |
| P45479     | Ppt1       | Palmitoyl-protein thioesterase 1                                                                              |
| A0A0G2K5R9 | RGD1560860 | Similar to ankyrin repeat domain 26                                                                           |
| Q4QQV6     | Lsp1       | Lymphocyte specific 1, isoform CRA_a                                                                          |
| P04916     | Rbp4       | Retinol-binding protein 4                                                                                     |
| Q499P2     | Lta4h      | Leukotriene A(4) hydrolase                                                                                    |
| P30121     | Timp2      | Metalloproteinase inhibitor 2                                                                                 |
| A0A0G2K1E1 | RT1-A1     | RT1 class Ia, locus A1                                                                                        |
| F1LP34     | Anp32b     | Acidic leucine-rich nuclear phosphoprotein 32 family member B                                                 |
| P62815     | Atp6v1b2   | V-type proton ATPase subunit B, brain isoform                                                                 |
| Q68FR6     | Eef1g      | Elongation factor 1-gamma                                                                                     |
| G3V6E7     | Fmod       | Fibromodulin                                                                                                  |

|            |              |                                                                                   |
|------------|--------------|-----------------------------------------------------------------------------------|
| P36972     | Aprt         | Adenine phosphoribosyltransferase                                                 |
| B0BMY7     | Twf2         | Protein tyrosine kinase 9-like (A6-related protein)<br>(Predicted), isoform CRA_b |
| P19945     | Rplp0        | 60S acidic ribosomal protein P0                                                   |
| F1MAB9     | Tpd52        | Tumor protein D52                                                                 |
| P38983     | Rpsa         | 40S ribosomal protein SA                                                          |
| B5DFD8     | Sh3bgrl      | SH3 domain-binding glutamic acid-rich-like protein                                |
| Q9Z2G8     | Nap1l1       | Nucleosome assembly protein 1-like 1                                              |
| D3ZB30     | Ptbp1        | Polypyrimidine tract binding protein 1, isoform CRA_c                             |
| Q675A5     | Pla2g15      | Group XV phospholipase A2                                                         |
| Q5XI32     | Capzb        | F-actin-capping protein subunit beta                                              |
| P27139     | Ca2          | Carbonic anhydrase 2                                                              |
| G3V940     | Coro1b       | Coronin                                                                           |
| Q62669     | LOC103694855 | Beta-globin                                                                       |
| D3ZZ89     | Trem2        | Triggering receptor expressed on myeloid cells 2<br>(Predicted), isoform CRA_a    |
| A0A0H2UHL6 | Ctsh         | Pro-cathepsin H                                                                   |
| G3V6P7     | Myh9         | Myosin heavy chain 9-like 1                                                       |
| G3V7H3     | Cfd          | Complement factor D                                                               |
| F1LVC3     | Rab6b        | RAB6B, member RAS oncogene family                                                 |
| Q5U300     | Uba1         | Ubiquitin-like modifier-activating enzyme 1                                       |
| O35567     | Atic         | Bifunctional purine biosynthesis protein PURH                                     |

|            |         |                                                                       |
|------------|---------|-----------------------------------------------------------------------|
| D3ZF11     | Lamtor5 | Hepatitis B virus x interacting protein (Predicted),<br>isoform CRA_a |
| A0A0G2JYS8 | Ppp1ca  | Serine/threonine-protein phosphatase                                  |
| G3V8C4     | Clic4   | Chloride intracellular channel protein                                |
| M0RCH5     | Gnpda1  | Glucosamine-6-phosphate isomerase                                     |
| P62994     | Grb2    | Growth factor receptor-bound protein 2                                |
| P83868     | Ptges3  | Prostaglandin E synthase 3                                            |
| G3V826     | Tkt     | Transketolase                                                         |
| P00507     | Got2    | Aspartate aminotransferase, mitochondrial                             |
| B2GVB9     | Fermt3  | Fermitin family member 3                                              |
| P17220     | Psma2   | Proteasome subunit alpha type-2                                       |
| A0A0G2JXT0 | Vps26a  | Vacuolar protein sorting-associated protein 26A                       |
| P50398     | Gdi1    | Rab GDP dissociation inhibitor alpha                                  |
| Q62667     | Mvp     | Major vault protein                                                   |
| A0A0G2K2V2 | Ap1b1   | AP complex subunit beta                                               |
| Q62636     | Rap1b   | Ras-related protein Rap-1b                                            |
| F1LMP7     | Grn     | Progranulin                                                           |
| Q5XIF6     | Tuba4a  | Tubulin alpha-4A chain                                                |
| Q66HH8     | Anxa5   | Annexin                                                               |
| Q66HD0     | Hsp90b1 | Endoplasmin                                                           |
| M0RCS3     |         | Ferritin                                                              |
| Q63081     | Pdia6   | Protein disulfide-isomerase A6                                        |

|            |          |                                                                                                 |
|------------|----------|-------------------------------------------------------------------------------------------------|
| P61980     | Hnrnpk   | Heterogeneous nuclear ribonucleoprotein K                                                       |
| A0A0G2K4Q4 |          | Uncharacterized protein                                                                         |
| O35828     | Coro7    | Coronin-7                                                                                       |
| O89049     | Txnrd1   | Thioredoxin reductase 1, cytoplasmic                                                            |
| Q6GMN8     | Actn1    | Actn1 protein                                                                                   |
| A0A0H2UHE2 | Il1rn    | Interleukin-1                                                                                   |
| P21670     | Psma4    | Proteasome subunit alpha type-4                                                                 |
| Q68FS4     | Lap3     | Cytosol aminopeptidase                                                                          |
| O70513     | Lgals3bp | Galectin-3-binding protein                                                                      |
| P13668     | Stmn1    | Stathmin                                                                                        |
| G3V9Q3     | Hnrnph1  | Heterogeneous nuclear ribonucleoprotein H                                                       |
| Q63041     | A1m      | Alpha-1-macroglobulin                                                                           |
| Q5XI34     | Ppp2r1a  | Protein phosphatase 2 (Formerly 2A), regulatory subunit A (PR 65), alpha isoform, isoform CRA_a |
| D3ZVB7     | Ogn      | Osteoglycin                                                                                     |
| Q5XIM9     | Cct2     | T-complex protein 1 subunit beta                                                                |
| Q4KM35     | Psmb10   | Proteasome subunit beta type-10                                                                 |
| P63245     | Rack1    | Receptor of activated protein C kinase 1                                                        |
| D3ZUL3     | Col6a1   | Collagen type VI alpha 1 chain                                                                  |
| Q7TPB1     | Cct4     | T-complex protein 1 subunit delta                                                               |
| Q4KM75     | Cd5l     | CD5 antigen-like                                                                                |
| F7EQ81     | Gns      | N-acetylglucosamine-6-sulfatase                                                                 |

|            |         |                                                                       |
|------------|---------|-----------------------------------------------------------------------|
| B0BNN4     | Cfp     | Complement factor properdin                                           |
| D4A8G5     | Tgfb1   | Transforming growth factor, beta-induced                              |
| B0K010     | Txndc17 | Thioredoxin domain-containing 17                                      |
| F1M7X3     | Cdh13   | Cadherin 13                                                           |
| Q5XIE0     | Anp32e  | Acidic leucine-rich nuclear phosphoprotein 32 family member E         |
| B2GUZ5     | Capza1  | F-actin-capping protein subunit alpha-1                               |
| P85515     | Actr1a  | Alpha-centractin                                                      |
| D4AC23     | Cct7    | T-complex protein 1 subunit eta                                       |
| F1LMS5     | Thbs4   | Thrombospondin-4                                                      |
| A0A0G2K943 | Ap2a2   | AP-2 complex subunit alpha                                            |
| Q91Y81     | Sept2   | Septin-2                                                              |
| B2GUX7     | Creg1   | Cellular repressor of E1A-stimulated genes (Predicted), isoform CRA_b |
| B2RYG6     | Otub1   | Ubiquitin thioesterase OTUB1                                          |
| P02454     | Col1a1  | Collagen alpha-1(I) chain                                             |
| F1LST1     | Fn1     | Fibronectin                                                           |
| B0BNJ1     | Sri     | LOC683667 protein                                                     |
| P09606     | Glul    | Glutamine synthetase                                                  |
| Q5I0D1     | Glod4   | Glyoxalase domain-containing protein 4                                |
| Q9QX80     | Hnrnpab | CARG-binding factor A                                                 |
| A0A0G2K911 | Nsf1c   | NSFL1 cofactor p47                                                    |

|            |         |                                                                        |
|------------|---------|------------------------------------------------------------------------|
| Q9JLJ3     | Aldh9a1 | 4-trimethylaminobutyraldehyde dehydrogenase                            |
| R9PXS4     | Pitpna  | Phosphatidylinositol transfer protein alpha isoform                    |
| F1LRV4     | Hspa4   | Heat shock 70 kDa protein 4                                            |
| P16296     | F9      | Coagulation factor IX                                                  |
| P14562     | Lamp1   | Lysosome-associated membrane glycoprotein 1                            |
| Q71SY3     | Tsn     | Translin                                                               |
| Q66WT9     | Picalm  | Clathrin-assembly lymphoid myeloid leukemia protein                    |
| D3ZZL3     | Naglu   | N-acetyl-alpha-glucosaminidase                                         |
| F1M6Z1     | Apob    | Apolipoprotein B-100                                                   |
| P70645     | Blmh    | Bleomycin hydrolase                                                    |
| Q7M0E3     | Dstn    | Destrin                                                                |
| P11980     | Pkm     | Pyruvate kinase PKM                                                    |
| D4AEH3     | Psmc7   | Proteasome (Prosome, macropain) 26S subunit, non-ATPase, 7 (Predicted) |
| A0A096MJ04 | Gsto1   | Glutathione S-transferase omega 1, isoform CRA_a                       |
| F1M9V7     | Npepps  | Aminopeptidase                                                         |
| A0A0G2KAT4 | Ddx39b  | Spliceosome RNA helicase Ddx39b                                        |
| B2RYC9     | Gba     | Glucosylceramidase                                                     |
| O70257     | Stx7    | Syntaxin-7                                                             |
| O55096     | Dpp3    | Dipeptidyl peptidase 3                                                 |
| A0A0G2K0W9 | Psma7   | Proteasome subunit alpha type                                          |
| Q4KM73     | Cmpk1   | UMP-CMP kinase                                                         |

|            |          |                                                 |
|------------|----------|-------------------------------------------------|
| M0R544     | Gaa      | Glucosidase, alpha, acid, isoform CRA_a         |
| Q68FR9     | Eef1d    | Elongation factor 1-delta                       |
| F1M9B9     | Il1rap   | Interleukin-1 receptor accessory protein        |
| Q6P502     | Cct3     | T-complex protein 1 subunit gamma               |
| G3V8A5     | Vps35    | Vacuolar protein sorting-associated protein 35  |
| Q641Z6     | Ehd1     | EH domain-containing protein 1                  |
| Q07009     | Capn2    | Calpain-2 catalytic subunit                     |
| A0A0G2K890 | Ezr      | Ezrin                                           |
| D3ZVH2     |          | Uncharacterized protein                         |
| P29066     | Arrb1    | Beta-arrestin-1                                 |
| Q5FVI6     | Atp6v1c1 | V-type proton ATPase subunit C 1                |
| M0RB74     | Ipo5     | Importin 5                                      |
| Q7TQ94     | Nit1     | Deaminated glutathione amidase                  |
| P52296     | Kpnb1    | Importin subunit beta-1                         |
| B0BN93     | Psmd13   | 26S proteasome non-ATPase regulatory subunit 13 |
| Q711G3     | Iah1     | Isoamyl acetate-hydrolyzing esterase 1 homolog  |
| P97536     | Cand1    | Cullin-associated NEDD8-dissociated protein 1   |
| Q68FR2     | Bin2     | Bridging integrator 2                           |
| D3ZV60     | Cenpe    | Centromere protein E                            |
| Q5XIM7     | Kars     | Lysine--tRNA ligase                             |
| Q7TQ70     | Fga      | Ac1873                                          |
| F1M7X5     | Dpp4     | Dipeptidyl peptidase 4                          |

|            |                |                                                 |
|------------|----------------|-------------------------------------------------|
| Q3MHS9     | Cct6a          | Chaperonin containing Tcp1, subunit 6A (Zeta 1) |
| Q68FQ0     | Cct5           | T-complex protein 1 subunit epsilon             |
| P41562     | Idh1           | Isocitrate dehydrogenase [NADP] cytoplasmic     |
| G3V6T7     | Pdia4          | Protein disulfide-isomerase A4                  |
| F1LMZ8     | Psmd11         | 26S proteasome non-ATPase regulatory subunit 11 |
| M0RD54     | CEFIP          | Cardiac-enriched FHL2-interacting protein       |
| A0A0G2JSK9 | Bhmt           | Betaine--homocysteine S-methyltransferase 1     |
| Q4G075     | Serpib1a       | Leukocyte elastase inhibitor A                  |
| D3ZVQ0     | Usp5           | Ubiquitin carboxyl-terminal hydrolase           |
| Q68FX4     | Hcls1          | Hematopoietic cell-specific LYN substrate 1     |
| Q9ESQ7     | Psd            | PH and SEC7 domain-containing protein 1         |
| F7EPH4     | Ppa1           | Pyrophosphatase (inorganic) 1                   |
| A0A0G2K5E8 | NEWGENE_621351 | Collagen, type I, alpha 2                       |
| A0A0G2K509 | Krt5           | Keratin, type II cytoskeletal 5                 |
| Q5XI58     | Ccin           | Calicin                                         |
| P04961     | Pcna           | Proliferating cell nuclear antigen              |
| P14408     | Fh             | Fumarate hydratase, mitochondrial               |
| D3ZL24     | Cast           | Calpastatin                                     |
| A0A0A0MY22 | Siae           | Sialate O-acetyltransferase                     |
| G3V6S2     | Aco1           | Cytoplasmic aconitate hydratase                 |
| G3V824     | Igf2r          | Insulin-like growth factor 2 receptor           |
| Q63768     | Crk            | Adapter molecule crk                            |



|            |              |                                                         |
|------------|--------------|---------------------------------------------------------|
| P46413     | Gss          | Glutathione synthetase                                  |
| A0A0G2JU96 | Ahnak        | AHNAK nucleoprotein                                     |
| D3ZDT1     | Epb41l2      | Erythrocyte membrane protein band 4.1-like 2            |
| Q4FZY0     | Efhd2        | EF-hand domain-containing protein D2                    |
| Q8R3Z7     | Ehd4         | EH-domain-containing 4                                  |
| A0A0G2K666 | Kcnq4        | Potassium voltage-gated channel subfamily KQT member 4  |
| Q6P762     | Man2b1       | Alpha-mannosidase                                       |
| Q6AXW2     | Tmod3        | RCG25684, isoform CRA_a                                 |
| Q4FZV0     | Manba        | Beta-mannosidase                                        |
| Q9Z1X1     | Esyt1        | Extended synaptotagmin-1                                |
| D4ACB8     | Cct8         | Chaperonin subunit 8 (Theta) (Predicted), isoform CRA_a |
| D3ZE62     | Atp8b3       | Phospholipid-transporting ATPase                        |
| Q01460     | Ctbs         | Di-N-acetylchitobiase                                   |
| P53534     | Pygb         | Glycogen phosphorylase, brain form (Fragment)           |
| Q4AEF8     | Copg1        | Coatomer subunit gamma-1                                |
| G3V928     | Lrp1         | LDL receptor-related protein 1                          |
| O35763     | Msn          | Moesin                                                  |
| Q03336     | Rgn          | Regucalcin                                              |
| Q63083     | Nucb1        | Nucleobindin-1                                          |
| A0A0G2JYA4 | LOC100362453 | Serine/threonine-protein phosphatase                    |

|            |              |                                                            |
|------------|--------------|------------------------------------------------------------|
| A0A0G2K1J5 | Plec         | Plectin                                                    |
| A0A0G2K2W1 |              | Uncharacterized protein                                    |
| A0A0G2K7R7 | Rnf216       | Ring finger protein 216                                    |
| A0A0G2K9E8 | Myo1e        | Unconventional myosin-Ie                                   |
| D3ZBN0     | Hist1h1b     | Histone H1.5                                               |
| F1LZ64     | Abhd12b      | Abhydrolase domain-containing 12B                          |
| M0R4B6     | LOC102555453 | RCG64424                                                   |
| M0RAM5     | Gpx1         | Glutathione peroxidase                                     |
| P28480     | Tcp1         | T-complex protein 1 subunit alpha                          |
| P41542     | Uso1         | General vesicular transport factor p115                    |
| P50503     | St13         | Hsc70-interacting protein                                  |
| Q5U2S5     | Snx24        | Sorting nexin-24                                           |
| Q6AXN2     | Efemp1       | EGF-containing fibulin-like extracellular matrix protein 1 |
| Q6IMY6     | Lipa         | Lipase                                                     |
| Q6IUU3     | Qsox1        | Sulfhydryl oxidase 1                                       |
| Q6PDW1     | Rps12        | 40S ribosomal protein S12                                  |
| Q6PDW4     | Psmb1        | Proteasome subunit beta                                    |
| A0A096MJJ6 | Acbd5        | Acyl-CoA-binding domain-containing protein 5               |
| A0A0G2JVH1 | Myo5b        | Unconventional myosin-Vb                                   |
| A0A0G2K2T4 | Lrp4         | Low-density lipoprotein receptor-related protein 4         |
| A0A0G2K7N8 | Bptf         | Uncharacterized protein                                    |
| A0A0G2K8L5 |              | Uncharacterized protein                                    |

|            |            |                                                                                     |
|------------|------------|-------------------------------------------------------------------------------------|
| A0A0G2KAG3 | Atp6v1g2   | ATPase H <sup>+</sup> -transporting V1 subunit G2                                   |
| B1WC92     | RGD1561552 | RGD1561552 protein                                                                  |
| B5DFK6     | Ap3d1      | Adaptor-related protein complex 3 subunit delta 1                                   |
| D3Z851     | Fbxl21     | F-box and leucine-rich repeat protein 21                                            |
| D3ZE01     | Kif14      | Kinesin family member 14                                                            |
| D3ZE91     | Kctd9      | Potassium channel tetramerisation domain containing 9<br>(Predicted), isoform CRA_b |
| D3ZFJ0     | Pik3cg     | Phosphatidylinositol-4,5-bisphosphate 3-kinase,<br>catalytic subunit gamma          |
| D3ZGB8     | Cilp       | Cartilage intermediate layer protein                                                |
| D3ZKH2     | Mon2       | MON2 homolog, regulator of endosome-to-Golgi-<br>trafficking                        |
| D3ZQE8     | Xpo5       | Exportin 5                                                                          |
| D3ZQI6     | Xpo4       | Exportin 4                                                                          |
| D3ZY40     | Pcf11      | PCF11 cleavage and polyadenylation factor subunit                                   |
| D3ZYB8     | Tex15      | Testis-expressed 15, meiosis and synapsis-associated                                |
| D4A1D3     | Sacs       | Sacsin molecular chaperone                                                          |
| D4A4D3     | Tet1       | Tet methylcytosine dioxygenase 1                                                    |
| D4A5Q2     | Smc2       | Structural maintenance of chromosomes protein                                       |
| D4A5S1     | Usp26      | RCG53229                                                                            |
| D4A624     | Sgo1       | Shugoshin 1                                                                         |
| F1LVL5     | Shroom4    | Shroom family member 4                                                              |

|        |              |                                                         |
|--------|--------------|---------------------------------------------------------|
| F1LY25 | Kcnq5        | Potassium voltage-gated channel subfamily Q member<br>5 |
| F1M775 | Diaph1       | Protein diaphanous homolog 1                            |
| F1M974 | Nsmaf        | Neutral sphingomyelinase activation-associated factor   |
| F7FKK4 | Atxn7l2      | Ataxin 7-like 2                                         |
| G3V8K3 | LOC100911109 | Sperm associated antigen 4, isoform CRA_b               |
| M0R9N9 | Mbtd1        | Mbt domain-containing 1                                 |
| M0RCI4 |              | Uncharacterized protein                                 |
| P18266 | Gsk3b        | Glycogen synthase kinase-3 beta                         |
| P60711 | Actb         | Actin, cytoplasmic 1                                    |
| P63041 | Cplx1        | Complexin-1                                             |
| P68136 | Acta1        | Actin, alpha skeletal muscle                            |
| Q2HWF0 | Fnbp1l       | Formin-binding protein 1-like                           |
| Q3T1I3 | Ushbp1       | Usher syndrome type-1C protein-binding protein 1        |
| Q5I0J2 | Mad2l1bp     | MAD2L1-binding protein                                  |
| Q5PQK4 | Uimc1        | BRCA1-A complex subunit RAP80                           |
| Q63358 | Myo9b        | Unconventional myosin-Ixb                               |
| Q64595 | Prkg2        | cGMP-dependent protein kinase 2                         |
| Q68FU8 | Sugp1        | SURP and G-patch domain-containing protein 1            |
| Q6AXT3 | Arl13a       | ADP-ribosylation factor-like protein 13A                |
| Q6IMY8 | Hnrnpu       | Heterogeneous nuclear ribonucleoprotein U               |
| Q6P5P3 | Ttc9c        | Tetratricopeptide repeat protein 9C                     |

|        |        |                                                  |
|--------|--------|--------------------------------------------------|
| Q78E60 | Arnt2  | Aryl hydrocarbon receptor nuclear translocator 2 |
| Q8VIP2 | Mlxip1 | Carbohydrate-responsive element-binding protein  |

---

# Supplementary Figures

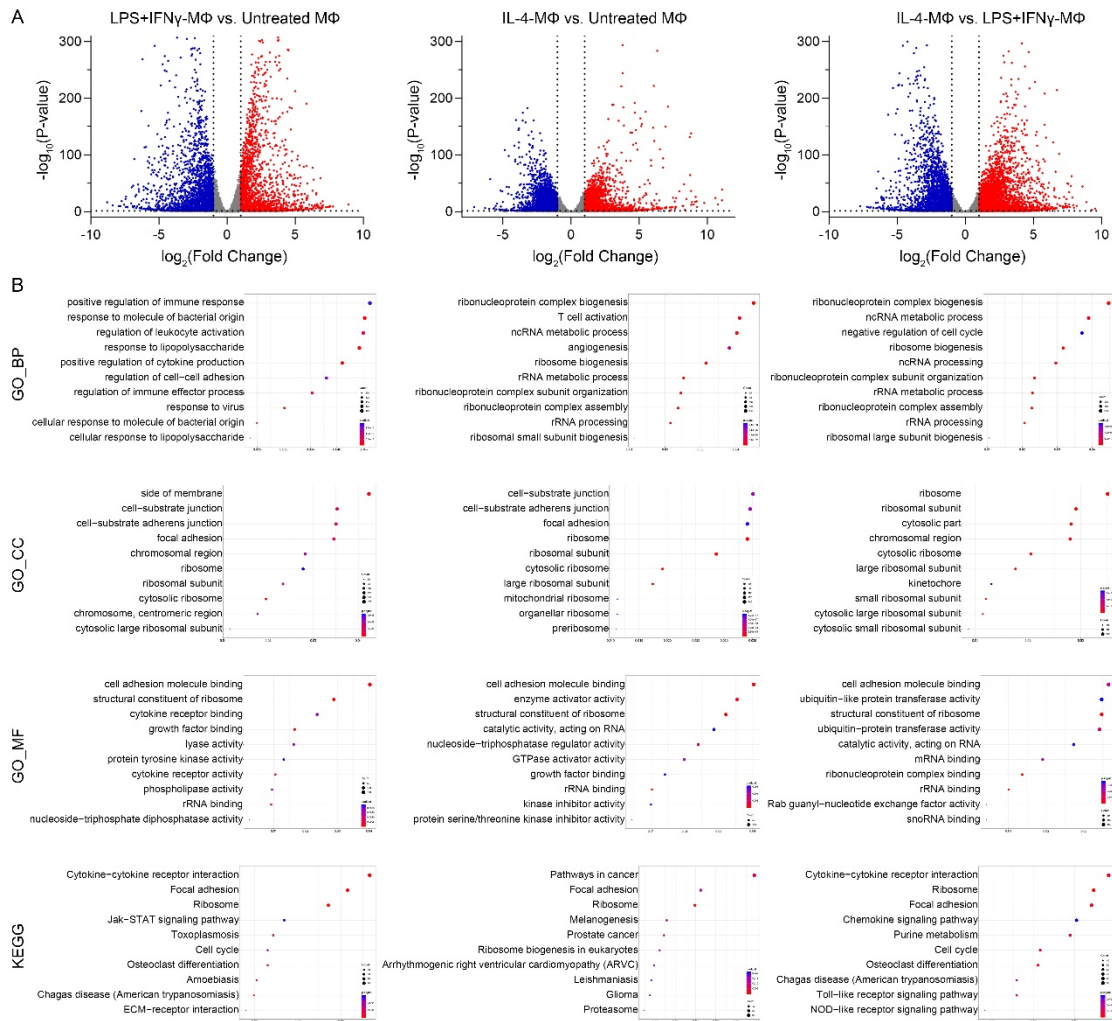

**Figure S1: RNA-seq analysis of rat BMDMs**

(A) Volcano Plot of RNA-seq of rat BMDMs. Red dots represent upregulated genes; blue dots represent downregulated genes. (B) GO and KEGG Enrichment analysis of RNA-seq of rat BMDMs.

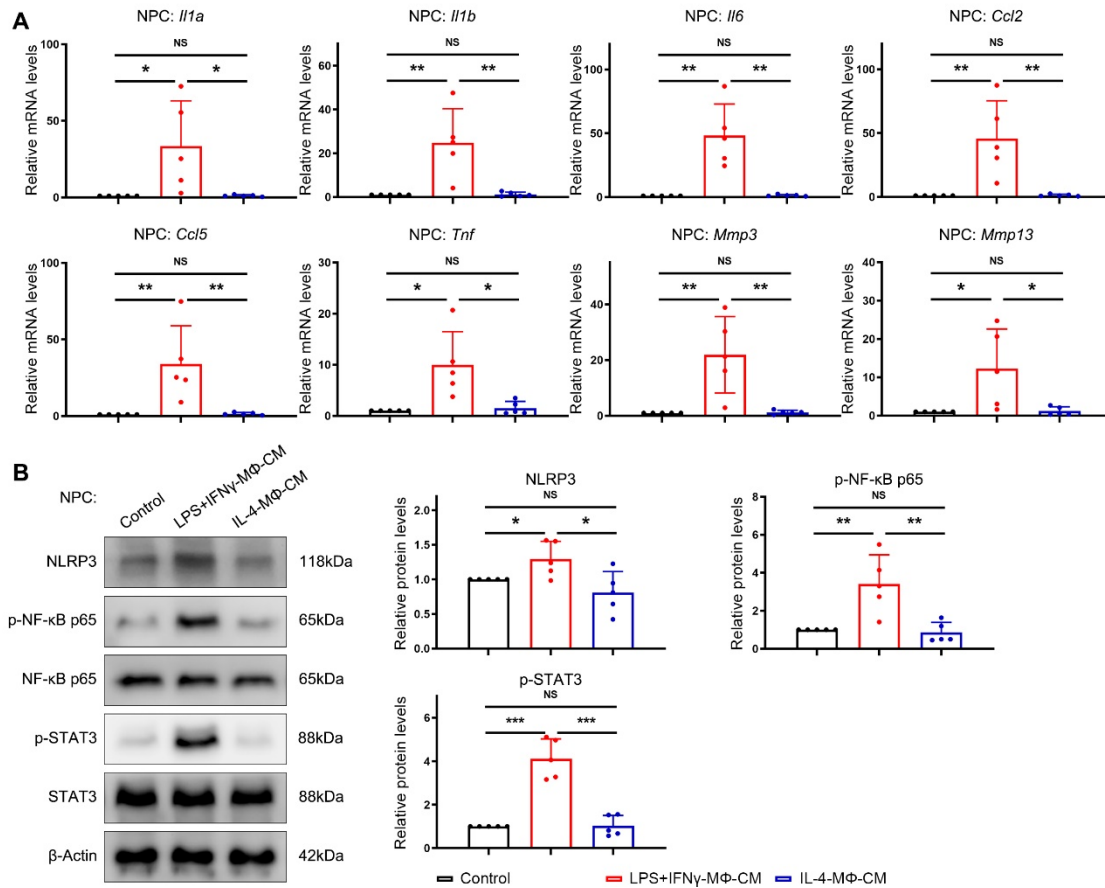

**Figure S2: LPS+IFN $\gamma$ -M $\Phi$ -CM stimulated inflammatory and catabolic cascades in NPCs**

(A) The mRNA levels of *Il1a*, *Il1b*, *Il6*, *Ccl2*, *Ccl5*, *Tnf*, *Mmp3*, and *Mmp13* in NPCs. (B)

Representative WB graphs of NLRP3, p-NF- $\kappa$ B p65, NF- $\kappa$ B p65, p-STAT3, and STAT3 in

NPCs. (NS: not significant, \* $P < 0.05$ , \*\* $P < 0.01$ , \*\*\* $P < 0.001$ ,  $n = 5$ )

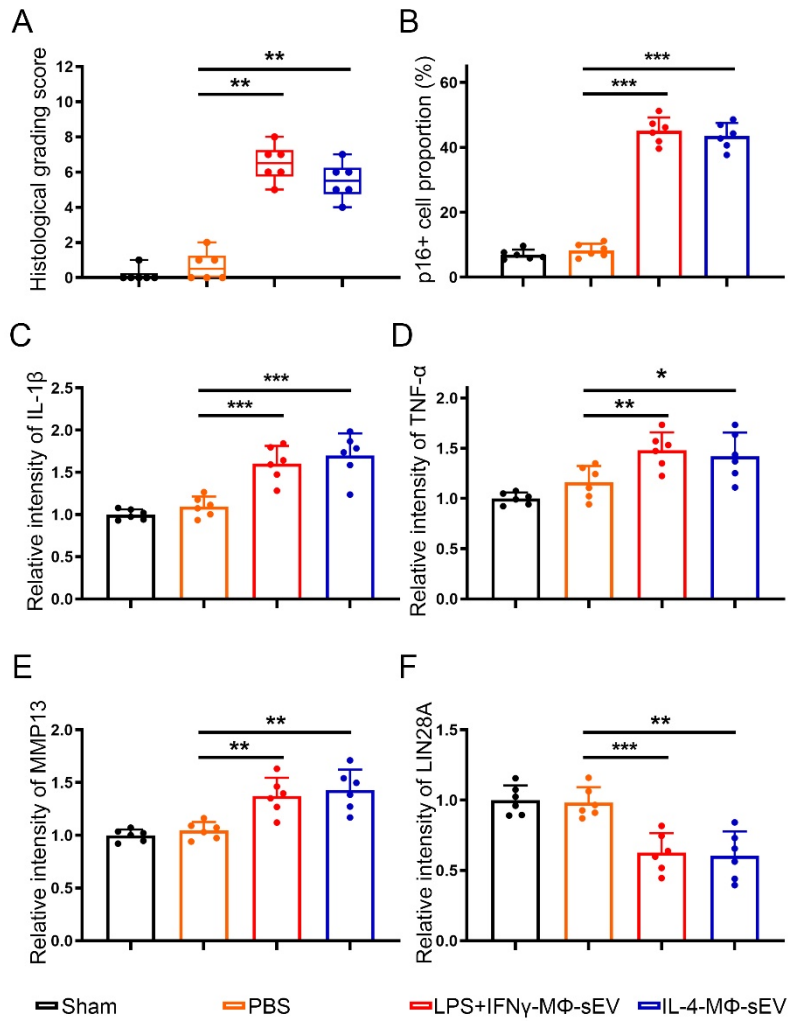

**Figure S3: Statistical analyses of histological evaluation**

(A) Histological grading scores assessed by HE and SOFG staining. (B-F) Semi-quantitative analyses of the expression levels of p16, IL-1 $\beta$ , TNF- $\alpha$ , MMP13, and LIN28A in rat coccygeal IVD tissues injected with M $\Phi$ -sEVs. (NS: not significant, \* $P < 0.05$ , \*\* $P < 0.01$ , \*\*\* $P < 0.001$ ,  $n = 6$ )



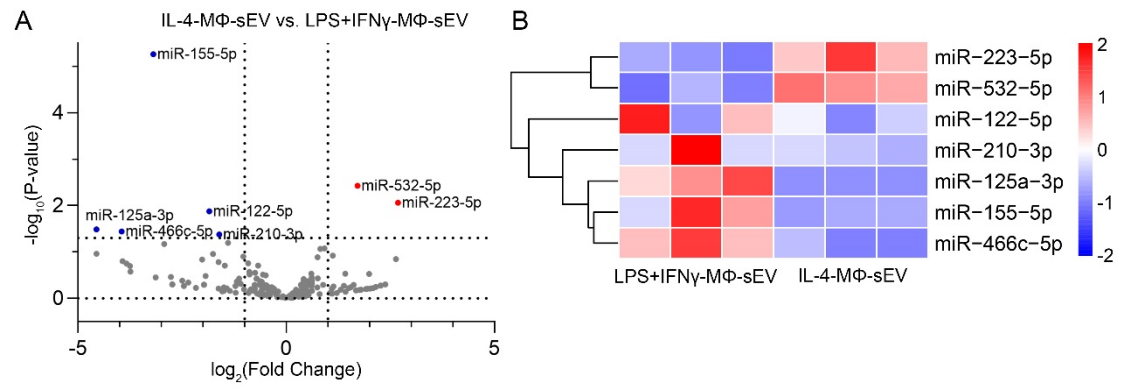

**Figure S4: PANDORA-seq analysis of MΦ-sEVs**

(A) Volcano Plot of PANDORA-seq of MΦ-sEVs. Red dots represent upregulated miRNAs;

blue dots represent downregulated miRNAs. (B) Heatmap of PANDORA-seq of MΦ-sEVs.

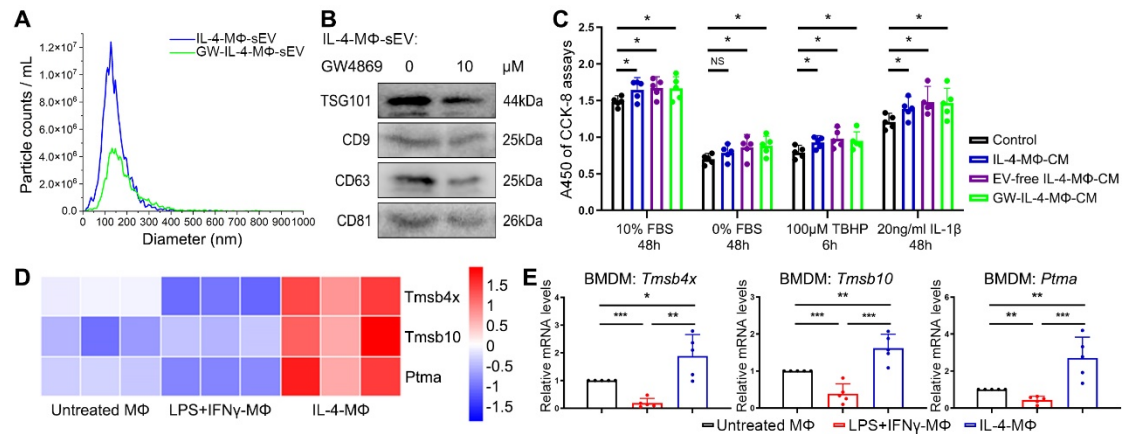

**Figure S5: Removal of EVs improved the cytoprotective effects of IL-4-MΦ-CM**

(A) The particle concentrations of MΦ-sEVs measured by NTA. (B) Representative WB graphs of TSG101, CD9, CD63, and CD81 in IL-4-MΦ-sEVs. (C) The viability of NPCs measured by CCK-8 assays. (D) Heatmap of RNA-seq of rat BMDMs. Red represents high expression; blue represents low expression. (E) The mRNA levels of *Tmsb4x*, *Tmsb10*, *Ptma* in BMDMs. (NS: not significant, \* $P < 0.05$ , \*\* $P < 0.01$ , \*\*\* $P < 0.001$ ,  $n = 5$ )
